1     **Comprehensive biological interpretation of gene signatures using semantic**  
2                                     **distributed representation**

3

4                     Short title: Biological interpretation of gene signatures using NLP

5

6     Yuumi Okuzono\*, Takashi Hoshino

7     Immunology Unit, Pharmaceutical Research Division, Takeda Pharmaceutical Company

8     Limited, Fujisawa, Kanagawa, Japan

9

10    \*Corresponding author

11    E-mail: [yuumi.okuzono@takeda.com](mailto:yuumi.okuzono@takeda.com)

12

13

14

## 15 **Abstract**

16       Recent rise of microarray and next-generation sequencing in genome-related fields has  
17 simplified obtaining gene expression data at whole gene level, and biological interpretation of  
18 gene signatures related to life phenomena and diseases has become very important. However,  
19 the conventional method is numerical comparison of gene signature, pathway, and gene  
20 ontology (GO) overlap and distribution bias, and it is not possible to compare the specificity  
21 and importance of genes contained in gene signatures as humans do.

22       This study proposes the gene signature vector (GsVec), a unique method for interpreting  
23 gene signatures that clarifies the semantic relationship between gene signatures by  
24 incorporating a method of distributed document representation from natural language  
25 processing (NLP). In proposed algorithm, a gene-topic vector is created by multiplying the  
26 feature vector based on the gene's distributed representation by the probability of the gene  
27 signature topic and the low frequency of occurrence of the corresponding gene in all gene  
28 signatures. These vectors are concatenated for genes included in each gene signature to create  
29 a signature vector. The degrees of similarity between signature vectors are obtained from the  
30 cosine distances, and the levels of relevance between gene signatures are quantified.

31       Using the above algorithm, GsVec learned approximately 5,000 types of canonical  
32 pathway and GO biological process gene signatures published in the Molecular Signatures  
33 Database (MSigDB). Then, validation of the pathway database BioCarta with known

34 biological significance and validation using actual gene expression data (differentially  
35 expressed genes) were performed, and both were able to obtain biologically valid results. In  
36 addition, the results compared with the pathway enrichment analysis in Fisher's exact test  
37 used in the conventional method resulted in equivalent or more biologically valid signatures.  
38 Furthermore, although NLP is generally developed in Python, GsVec can execute the entire  
39 process in only the R language, the main language of bioinformatics.

40

## 41 **Introduction**

42 The recent rise of microarray and next-generation sequencing (NGS) in genome-related  
43 fields has made it possible to easily acquire gene expression data at the whole gene level. As a  
44 result, interpretation of life phenomena and diseases is advancing [1].

45 To identify the gene population involved in a phenotype, gene expression data for  
46 comparison between healthy subjects and subjects with diseases as well as treated and  
47 untreated groups can be obtained. Based on the correlation between the representative  
48 expression value of the gene signature and the phenotype, the gene signature of genes related  
49 to the phenotype can be identified, and the biological interpretation of gene signatures can be  
50 performed.

51 To interpret a gene signature identified in this data-driven manner, it is necessary to  
52 avoid bias due to the large number of genes that must be interpreted and comprehensiveness

53 and completeness of human knowledge. Therefore, interpretation is commonly performed by  
54 comparing the gene signature, such as differentially expressed genes and gene modules,  
55 against a biological gene signature database (such as pathway and GO) and identifying an  
56 objective association from a biological perspective [2].

57 Numerous methodologies for association with pathways have been proposed. Common  
58 examples include Fisher's exact test, which is a classical statistical test for the specific overlap  
59 of genes; over-representation analysis and gene set enrichment analysis [3], which statistically  
60 process the number of overlapping genes and ranking bias by incorporating randomization;  
61 and modular enrichment analysis and EnrichNet with graph-based statistics of biological  
62 networks [4, 5].

63 However, these comparisons are numerical, and it is thus not possible to compare the  
64 semantic nuances of the included genes as humans do. After performing the aforementioned  
65 analyses, to interpret the gene signature it is necessary to perform a number of comprehensive  
66 judgments to identify whether the genes overlapped by humans are specific to the pathway,  
67 determine their biological importance, and establish whether they contain genes that have  
68 similar meaning without direct overlap.

69 In this study, we propose a novel method for associating biological gene signatures by  
70 applying a distributed representation model [6] of documents to facilitate the interpretation of  
71 gene signatures (see Fig 1). The distributed representation of documents is a technology for

72 vectorizing documents of any length that was developed in the field of natural language  
73 processing (NLP). Words (that are included in documents) and documents (that are sets of  
74 words) are vectorized to convert a semantic expression of the words and documents into a  
75 mathematical expression that can be easily processed by a computer. As the first step, feature  
76 extraction is performed at the word level, and as the second step, feature extraction is  
77 performed at the document level as a set of words. Because feature vectors can be  
78 semantically compared by performing mathematical comparisons, they are used in a variety  
79 of real-world situations, such as sentence classification, content recommendation, sentiment  
80 analysis, and spam filtering [7].

81

82 **Fig 1. Research concept.**

83

84 Beginning with Doc2Vec [8], which used a distributed representation of words,  
85 innovative techniques related to the distributed expression of a large number of sentences  
86 have been proposed in the past several years, and the accuracy of document interpretation has  
87 improved [9]. Typical methods of distributed representation of documents include statistical  
88 semantic extraction methods [10], methods that combine distributed representations of words  
89 [11] into document representations [12], methods that directly compress word and document  
90 IDs [8], methods of summing word vectors by multiplying the topics and specificities in the

91 documents [9].

92       There are other NLP methods for the distributed representation of documents; however,  
93 the methods applicable to bioinformatics are limited, as there are differences in assumptions  
94 between NLP and bioinformatics. A meaningful component in bioinformatics is a gene, which  
95 corresponds to a word in NLP. In addition, a gene signature, which is a set of genes,  
96 corresponds to a document, which is a set of words. However, in NLP, the order and context  
97 of words are important, whereas the order of gene signatures compiled in a general pathway  
98 database often has no meaning.

99       In this study, we developed an original method for the interpretation of gene signatures  
100 by applying a distributed expression algorithm. The algorithm extracts semantic features of  
101 genes and their biological gene signatures and reveals specific relationships by comparing the  
102 abovementioned signatures with the gene signatures to be interpreted (e.g., differentially  
103 expressed genes, gene modules). As training data, a gene signature was used, which has a  
104 clear biological meaning in the molecular signatures database (MSigDB) [13] used in the  
105 conventional pathway enrichment analysis. Furthermore, Python is the primary programming  
106 language used for machine learning and NLP analysis; however, our proposed method can  
107 execute the entire process in R, which is the primary language in the analysis domain of  
108 bioinformatics. Therefore, the proposed method can be immediately used without further  
109 modification for bioinformatics analysis. Combining our proposed method of biological gene

110 signature vectorization with conventional enrichment analysis can allow for more intuitive  
111 and reliable interpretation of gene signatures.

112

## 113 **Results**

### 114 **Construction of gene and gene signature feature vectors by distributed representation**

115 In this study, we developed a method for creating gene signature feature vectors and  
116 clarifying semantic similarity by applying methodology from the field of NLP (Fig 2). We  
117 defined proprietary functions using the packages published on the Comprehensive R Archive  
118 Network that can be used in the R language. In addition, we executed an original algorithm  
119 for creating a unique gene signature feature vector based on the sparse composite document  
120 vectors (SCDV) [9] method from NLP using only R language operations.

121

122 **Fig 2. Algorithm and workflow of GsVec.** GsVec is divided into preparation and analysis  
123 parts. In the preparation part, gene vectors are created from training data with a clear  
124 biological meaning (e.g., GO, Pathway, and Hallmark genes) using BOW and Word2Vec, and  
125 the probability of each cluster calculated by GMM is multiplied. Furthermore, gene-topic  
126 vectors are created by multiplying the inverse signature factor and averaging for each gene  
127 included in the gene signature. In the analysis part, validation data, which are not biologically  
128 interpreted gene signatures (e.g., differentially expressed genes and gene modules) are

129 converted into signature vectors from the gene-topic vector created using training data. The  
130 cosine similarity between the validation and training data is calculated to obtain the  
131 association with biological meaning.  $gv_i$  represents the vector of an arbitrary gene  $g_i$ ,  $c$   
132 represents the cluster,  $K$  represents the number of clusters,  $S_N$  represents the total number  
133 of gene signatures,  $Sf(g_i)$  represents the number of gene signatures including gene  $g_i$ , and  
134  $\oplus$  represents the concatenation.

135

136 The training data used 5,456 gene signatures (i.e., C2: Canonical pathway and C5: GO  
137 biological process), which were used in conventional pathway/GO enrichment.

138 A gene  $\times$  gene signature matrix was created for the gene signature (equivalent to the  
139 Bags of Word step in NLP), and gene features were expressed using a distributed word  
140 representation algorithm [14] to create gene vectors (equivalent to Word2Vec processing in  
141 NLP). The clusters corresponding to the topics present in these gene signatures were extracted  
142 by soft clustering of the gene vectors with a Gaussian mixture model (GMM) [15, 16]. The  
143 probabilities that each word contributes to each cluster were multiplied for each cluster to  
144 obtain the abovementioned gene vectors, and those vectors were combined for each gene to  
145 obtain gene-cluster vectors.

146 Simultaneously, by dividing the total number of gene signatures by the number of gene  
147 signatures for each gene that contain that gene, the scores for reducing the weight of the gene



148 appearing in various signatures were calculated. Hereinafter, this is referred to as the inverse  
149 signature factor, which is equivalent to IDF in NLP [17]. Gene-topic vectors were obtained by  
150 multiplying the abovementioned gene-cluster vectors by those scores. The signature vectors  
151 were obtained by averaging the gene-topic vectors for the genes included in each individual  
152 gene signature. The signature vectors which were feature vectors in the genes and the  
153 abovementioned gene signatures were used as training data in the subsequent analysis.

154

### 155 **Evaluation of gene signature vector (GsVec) performance using gene signatures with** 156 **known biological interpretation**

157 In this study, 5,242 gene signatures, excluding gene signatures derived from the  
158 BioCarta database from the C2 canonical pathway and C5 GO biological process, were used  
159 as training data. BioCarta's 214-gene signatures were used as validation data with a known  
160 biological meaning. Furthermore, in both the training and validation data, we selected gene  
161 signatures related to immune function by human selection and tagged them. The number of  
162 applicable gene signatures was 405.

163 Signature vectors of the validation data were created from the gene-topic vectors created  
164 during learning in the same way as the training data, and the degrees of relevance with the  
165 training data were evaluated by the cosine similarity score with the learning set (hereinafter,  
166 the result of the cosine similarity calculated by a series of operations is referred to as *GsVec*).

167 First, the GsVec results (i.e., similarity relationship between signature vectors) were  
168 visualized by two-dimensionally projecting them using t-distributed Stochastic Neighbor  
169 Embedding (t-SNE) [18] (Fig 3[A]). There was a tendency for immune-related signatures to  
170 be consolidated in one location. The abovementioned tendency was observed not only in the  
171 training data, but also in the validation data, and the meaning of the validation data was  
172 correctly predicted by GsVec. These results demonstrate that although GsVec using NLP is an  
173 entirely different approach from conventional methods, it can identify groups with similar  
174 meanings.

175

176 **Fig 3. GsVec accuracy evaluation and comparison with Fisher.** A) Matrix of the cosine  
177 distance between signature vectors of training and validation data projected in two dimensions  
178 with t-SNE. The size of the circle represents the number of genes included in each signature.  
179 Green color refers to training data related to immunity, purple to training data not related to  
180 immunity, blue to validation data related to immunity, and red to validation data not related to  
181 immunity. B) Scatter plot by the  $-\log_{10}$  P-value of Fisher and the cosine distance between the  
182 signature vectors of the training and validation data. A histogram of the distribution of each  
183 value is also illustrated. The R in the upper right of the scatter plot indicates the Pearson  
184 correlation coefficient between GsVec and Fisher.

185

186 Next, the P-value of the overlap between Fisher's exact test training data and validation

187 data was converted to a  $-\log_{10}$  value (hereinafter,  $-\log_{10}$  (P-value) obtained by Fisher's exact  
188 test is referred to as *Fisher*) and compared with the GsVec results. The correlation by Pearson  
189 coefficient score between GsVec and Fisher was 0.453, and the relationship with a score of  
190 0.75 or higher in GsVec was a significant score less than 0.001 ( $-\log_{10}$  (4)) in Fisher. In  
191 addition, the degree of relevance was concentrated in the Fisher distribution near 0, which  
192 was not significant, whereas in GsVec, the distribution had a long tail. These results suggest  
193 that GsVec was able to reflect robust results that were significant in Fisher, and could also  
194 associate gene signatures with interpretation that were difficult to interpret in Fisher (Fig  
195 3[B]).

196 In addition, the relationship between the gene signatures of individual validation data  
197 and training data was compared between GsVec and Fisher. The top 10 results were the same  
198 for GsVec and Fisher for gene signatures, with a large number of genes included in the gene  
199 signature in the training data and a large number of overlaps. Furthermore, in GsVec, even if  
200 a gene included in the gene signature in the training data was small and the number of  
201 overlapped genes was small, if the overlapped genes were characteristic genes in the signature  
202 vector space, there was a tendency to display high relevance. Typical results are presented in  
203 Fig 4.

204

205 **Fig 4. Comparison between GsVec and Fisher on top 15 results with high relevance**  
206 **between training data and validation data.** Each top 15 result that was highly correlated  
207 with the gene signature and GsVec of the validation data or that was highly significant with  
208 Fisher is presented in the left and right tables. The column *Training gene signature name*  
209 indicates the name of the corresponding training data, and the biological data that directly  
210 match the validation data are highlighted in yellow. The *genes* column contains the total  
211 number of genes included in the gene signature of the corresponding training data, the *overlap*  
212 column contains the number of genes overlapped between the corresponding validation data  
213 and training data, and the *Fisher's* column represents the  $-\log_{10}$  (P-value) of the significance  
214 of the corresponding training data and validation data by Fisher's exact test. The *GsVec*  
215 column exhibits similarities according to the cosine distance of the signature vectors of the  
216 corresponding training and validation data.

217

218 Here, we examined whether GsVec was able to produce biologically meaningful insights  
219 using three representative examples of immune-related pathways. In the Interleukin-1 receptor  
220 (IL1R) pathway, the direct gene signature name *IL1* or *Interleukin 1* could be identified in  
221 both GsVec and Fisher. Similar results were observed in the B cell receptor and Toll  
222 pathways, including *Toll-like receptor*. In addition, gene signature names indicating broader  
223 concepts, such as *cytokine signaling* and *pattern recognition receptor*, were observed in the

224 IL1R and Toll pathways, respectively. These were extracted by GsVec and are associated  
225 with biologically relevant gene signatures.

226

227 **Association of biological meaning with GsVec using differentially expressed genes**  
228 **(DEGs) from real data**

229 Data-driven gene signatures, such as DEGs in the affected tissues and normal tissues of  
230 diseases published in the Expression Atlas [19] and DEGs extracted from The Cancer  
231 Genome Atlas (TCGA) [20] data, were analyzed with GsVec and Fisher (Fig 5). In all  
232 datasets, DEGs were used; they were upregulated in the affected tissue compared to the  
233 normal tissue. However, because in cancer there were too many DEGs (approximately 1,000–  
234 2,000) for the pathway enrichment analysis, only the results of other diseases were  
235 interpreted. Additionally, only in multiple sclerosis (MS), the number of DEGs was low; thus,  
236 we analyzed not only upregulated (up) but also downregulated (down) DEGs. The individual  
237 analysis results are presented below.

238

239 **Fig 5. List of DEGs used for verification.** The table illustrates the DEG data of affected  
240 tissues and control tissues of the major public diseases used as data-driven signatures, not  
241 signatures compiled in terms of biological meaning. The *up* column contains the number of  
242 DEGs that were higher than the control for the disease, while the *down* column contains the  
243 DEG numbers that were lower than the control for the disease. The red frames represent

244 subsequent interpretations.

245

246 **Multiple sclerosis (MS) cerebrospinal fluid (CSF; E-MTAB-69).** In MS (up),  
247 B-cell-related signatures were identified in GsVec and Fisher (Fig 6). Although the  
248 involvement of T cells in the pathology of MS is well known, the participation of B cells has  
249 also attracted attention in recent years, and the possibility of therapeutic drugs targeting B  
250 cells has also been investigated [21, 22]. In contrast, in MS (down), the gene signature names  
251 *locomotion, taxis, or migration*, reminiscent of cell migration, were highly ranked. In this  
252 study, the dataset consisted of CSF-derived samples. The results indicated that the  
253 involvement of immune cells in the peripheral and central nervous system (CNS) was  
254 captured. Notably, the gene signature name, *nervous system development*, was highly ranked  
255 only in GsVec. In other words, when considering the pathological condition of MS, GsVec  
256 captured not only immunological but also neuronal aspects and was able to extract more  
257 biologically valid signatures.

258

259 **Fig 6. Comparison between GsVec and Fisher of top 15 results with high relevance in**

260 **DEGs of multiple sclerosis (MS).** Using the DEGs of MS cerebrospinal fluid (E-MTAB-69)

261 as validation data, each top 15 result that was highly correlated with GsVec or highly

262 significant with Fisher is presented in the left and right tables. The *genes* column contains the

263 total number of genes included in the gene signature of the corresponding training data, the  
264 *overlap* column contains the number of genes overlapped between the corresponding  
265 validation and training data, and the *Fisher's* column represents  $-\log_{10}$  (P-value) of the  
266 significance of the corresponding training data and validation data by Fisher's exact test. The  
267 *GsVec* column exhibits similarities according to the cosine distance of the signature vectors of  
268 the corresponding training and validation data.

269

270 **Crohn's disease (CD) colon (E-MEXP-2083, E-GEOD-59071).** We examined a dataset of  
271 fresh frozen ileum mucosal tissue from CD patients, and gene signatures, such as *interferon*  
272 *gamma*, *cell adhesion*, and *leukocyte migration* were highly ranked in GsVec (see Fig 7). For  
273 inflammatory bowel diseases, such as CD and ulcerative colitis, it has been reported that  
274 intestinal immune cell trafficking has been identified as a central event in the pathogenesis of  
275 diseases. Additionally, cell adhesion is a pivotal step in several aspects of immune cell  
276 trafficking [23]. In Fisher, *interferon gamma* was highly ranked, and the broader concept  
277 *cytokine* was also highly ranked. However, the gene signature *asthma*, which may not be  
278 directly related to CD, was also highly ranked in Fisher. It has been reported that there are  
279 many common risk factors for the association between asthma and CD, including genetic and  
280 environmental factors [24]. Thus, GsVec and Fisher in CD displayed a similar trend but  
281 identified different characteristics on the whole. GsVec can extract more biologically

282 meaningful signatures.

283

284 **Fig 7. Comparison between GsVec and Fisher of top 15 results with high relevance in**  
285 **DEGs of Crohn's disease (CD).** Using the DEGs of CD colon (E-MEXP-2083,  
286 E-GEOD-59071) as validation data, each top 15 result that was highly correlated with GsVec  
287 or highly significant with Fisher is presented in the left and right tables. The details of each  
288 column are identical to those in Fig 6.

289

290 **Type 2 diabetes (T2D) islet of Langerhans (E-MTAB-5060).** In this study, we used a  
291 dataset consisting of islet of Langerhans tissue from healthy donors and T2D patients. In both  
292 GsVec and Fisher, gene signatures related to inflammation such as *inflammatory response*,  
293 *migration*, and *wound* were highly ranked and demonstrated a similar trend (see Fig 8).  
294 Insulin resistance and beta cell dysfunction are well known in T2D pathologies, and  
295 inflammation is related to the pathogenesis of these conditions [25]. In addition, injury and  
296 wound healing processes associated with the term *wounding* are known to alter responses to  
297 growth factors and cytokines in addition to tissue remodeling through cell migration and  
298 proliferation [26, 27]. These scientific reports examined the effect of macrophages on  
299 T2D-related ulcers and skin wounds, but not the islets themselves. The direct cause-and-effect  
300 relationship is unknown; however, based on the GO term definition, the relationship was



301 linked to a gene signature involved in damaged tissue and tissue repair.

302

303 **Fig 8. Comparison between GsVec and Fisher of top 15 results with high relevance in**  
304 **DEGs of Type 2 diabetes (T2D).** Using the DEGs of T2D islet of Langerhans  
305 (E-MTAB-5060) as validation data, each top 15 result that had high correlation with GsVec  
306 or high significance with Fisher is presented in the left and right tables.

307

308 **Duchenne muscular dystrophy (DMD) skeletal muscle (E-GEOD-3307).** We then  
309 examined DMD, and the results demonstrated that GsVec and Fisher displayed similar trends  
310 (Fig 9). Specifically, gene signatures such as *extracellular structure organization* related to  
311 the extracellular matrix and *ossification* related to the bone were highly ranked. DMD is an  
312 inherited muscular disorder known to be caused by an abnormality in dystrophin, a  
313 cytoskeletal protein, and has been linked to extracellular matrix-related molecules [28]. In  
314 addition, a relationship between bone morphogenetic proteins signals and this disease has  
315 been reported, and several biological features have been extracted [29].

316

317 **Fig 9. Comparison between GsVec and Fisher of top 15 results with high relevance in**  
318 **DEGs of Duchenne muscular dystrophy (DMD).** Using the DEGs of DMD skeletal muscle  
319 (E-GEOD-3307) as validation data, each top 15 result that was highly correlated with GsVec

320 or highly significant with Fisher is presented in the left and right tables.

321

322 **Systemic lupus erythematosus (SLE) whole blood (E-GSEOD-72509).** A whole blood  
323 dataset from SLE patients was analyzed as representative of autoimmune disease. The data  
324 were extracted from a heterogeneous population, including those with high and low interferon  
325 signature values. However, both GsVec and Fisher fully identified the signatures of  
326 immune-related genes with similar results (see Fig 10).

327

328 **Fig 10. Comparison between GsVec and Fisher of top 15 results with high relevance in**  
329 **DEGs of systemic lupus erythematosus (SLE).** Using SLE whole blood (E-GSEOD-72509)  
330 DEGs as validation data, each top 15 result that was highly correlated with GsVec or highly  
331 significant with Fisher is presented in the left and right tables.

332

333 **Sarcoidosis lung tissue (E-GEOD-16538).** We analyzed a dataset derived from lung tissue  
334 from sarcoidosis patients. The results indicated that the features of the gene signatures  
335 identified by GsVec and Fisher were partially different (Fig 11). In GsVec, gene signatures  
336 related to kinase activity, including *MAPK* (mitogen-activated protein kinase), were highly  
337 ranked, whereas Fisher identified several gene signatures related to *chemokine*. The original  
338 dataset was intended for the investigation of gene regulation of granulomatous sarcoidosis,

339 and it was reported that the gene network associated with the Th1-type response was  
340 overexpressed mainly in lung tissue derived from sarcoidosis [30]. In another paper, not only  
341 were Th1 cytokines increased in sarcoidosis, but MAPK, especially p38 activation, was found  
342 in cells of bronchoalveolar lavage fluid from patients with sarcoidosis [31]. Chemokines were  
343 also reported [32]. In summary, sarcoidosis-related gene signatures were identified; however,  
344 the two algorithms GsVec and Fisher exhibited different characteristics.

345

346 **Fig 11. Comparison between GsVec and Fisher of top 15 results with high relevance in**  
347 **DEGs of sarcoidosis.** Using the DEGs of sarcoidosis lung tissue (E-GEOD-16538) as  
348 validation data, each top 15 result that was highly correlated with GsVec or highly significant  
349 with Fisher is presented in the left and right tables.

350

351 **Schizophrenia (SCZ) brain Brodmann area 24 (GEOD-78936).** In examining SCZ, we  
352 used a dataset derived from postmortem brain tissue. In SCZ GsVec, gene signatures related  
353 to *hormone* were highly ranked (Fig 12). *Hormone* was a common but a unique result, which  
354 only ranked in GsVec, which suggests the involvement of dopamine in the limbic system  
355 [33]. Further, a gene signature, *nervous*, was also highly ranked. In contrast, in Fisher, gene  
356 signatures that suggested the involvement of other CNS cells, such as *glia cell* and *astrocyte*,  
357 were highly ranked and had different features.

358

359 **Fig 12. Comparison between GsVec and Fisher of top 15 results with high relevance in**  
360 **DEGs of schizophrenia (SCZ).** Using the DEGs of SCZ brain Brodmann area 24  
361 (GEOD-78936) as validation data, each top 15 result that was highly correlated with GsVec  
362 or highly significant with Fisher is presented in the left and right tables.

363

## 364 **Discussion**

365 In this paper, we propose a method for associating gene signatures by feature extraction  
366 using an NLP method. This method is entirely different from traditional pathway enrichment  
367 analysis for gene signature interpretation. Biologically reasonable results were obtained both  
368 in the verification of the pathway database (BioCarta) with known biological significance and  
369 in the verification using DEGs extracted from the actual gene expression. Compared to  
370 conventional pathway enrichment analysis by Fisher's exact test (Fisher), the proposed  
371 algorithm (GsVec) can identify a signature that is equivalent or more biologically relevant  
372 than Fisher.

373 Among diseases known to be related to immunity, GsVec tends to differentiate well  
374 between the biological features of autoimmune diseases. In MS, GsVec extracted more  
375 biologically valid signatures from immunological and neuronal aspects. Additionally, in CD,  
376 the signature called *interferon gamma* and other characteristics (e.g., *cell trafficking*) can be

377 extracted in GsVec. Moreover, in SCZ, a unique signature, *hormone*, was highly ranked only  
378 in GsVec. Thus, GsVec captured the signatures related to periphery and CNS more  
379 specifically than Fisher.

380 In this study, there were many reasons for selecting the SCDV-based method among the  
381 many methods related to distributed representation of documents in NLP. In the advance  
382 analysis, in comparing multiple methods, BOW and TFIDF did not consider gene similarity  
383 that was not directly overlapping, resulting in a high correlation with Fisher; thus, the  
384 advantage of using NLP methods was low. In the averaging of word2vec (gene vector), the  
385 specificity of a gene signature was not taken into account, and thus did not meet our purpose.  
386 In addition, as a result of assuming a general bioinformatics analysis environment (e.g., R  
387 language, PC specifications) as the potential of this research development, methods with a  
388 large amount of computation using deep learning were excluded from the candidates, as well  
389 as methods that were difficult to implement in the R language. Based on these considerations,  
390 the SCDV method was considered to be an optimal method that could be executed in a  
391 general bioinformatics analysis environment while capturing the characteristics of gene  
392 signatures.

393 However, there are several problems with this approach. First, it is difficult to determine  
394 whether approximately 5,000 gene signatures are sufficient as training data. In NLP, tens of  
395 thousands of data are generally used as training data. However, inadvertently mixing different

396 gene signatures to increase training data (e.g., other non-curation-based collections published  
397 in MSigDB) can adversely affect the quality of the signature vector. Further enhancement of  
398 pathway data with clear biological meaning is thus necessary.

399       Second, NLP can identify many words that appear in a specific document as important,  
400 but gene signatures do not duplicate genes in signatures; thus, the weight of important genes  
401 may be insufficient. This may create a discrepancy with human intuition regarding the key  
402 gene in the gene signature (pathway).

403       The third problem is a general problem in machine learning and artificial intelligence  
404 [34]. The relationship between signatures indicated by GsVec has strong elements that cannot  
405 be expressed by direct gene duplication; thus, it may be difficult to specify the rationale.  
406 Therefore, it may be desirable to combine GsVec with a well-grounded Fisher or other  
407 statistical method instead of using it on its own.

408       Despite the aforementioned problems, the proposed method demonstrates results that are  
409 equivalent or superior to those of conventional methods, and has high potential. Training data  
410 improvements, feature vectorization and topicalization methods, and identification of  
411 important genes are examples of potential improvements.

412       In the future, if the pathway database is generalized considering the direction of the  
413 regulatory relationship of genes, NLP methods that focus on context and learn to sequence  
414 from the beginning of sentences can also be applied in this field. Several NLP platforms are

415 already able to graph regulatory relationships between genes (e.g., IBM Watson for Drug  
416 Discovery). Improvements in the accuracy of these platforms will increase the value of  
417 methods that use NLP and are capable of biological interpretation close to human  
418 performance.

419

## 420 **Methods**

### 421 **Preparation of training and validation data**

422 A total of 5,254 gene signatures were used as a learning set whose genes fell within the  
423 range of 10 to 500 genes from KEGG and REACTOME in the C2 canonical pathway and C5  
424 GO biological process sets in MSigDB. Similarly, 214 gene signatures of BioCarta in the C2  
425 curated gene set were used as the validation set. For these signatures, only relevant gene  
426 signatures were extracted from the gtm file provided by MSigDB and saved in the same gtm  
427 format as MSigDB.

428 The following operations were performed using the R language integrated environment  
429 Microsoft R version 3.5 and R studio version 1.1.463. The created gtm file was converted to  
430 data.frame listing each gene signature's unique ID, name, description, number of genes, and  
431 gene symbol, and was output as a text file. The above operations can be executed in one step  
432 as the original R functions *make\_train.data* (for training data) and *make\_validation.data* (for  
433 validation data).

434

### 435 **Creation of gene vectors**

436 Gene feature vectors (gene vectors) were created using the R fastText package [35]. The  
437 number of characters used for subwording and the number of preceding and following words  
438 analyzed as related words was set to 10,000, and gene vectors were created by the  
439 co-occurrence of the entire gene signature without using functions for subwording, preceding  
440 and following words. First, a 1/0 matrix (one-hot vector) of genes  $\times$  gene signatures based on  
441 the presence/absence of corresponding genes was created. Then, a large 0/1 matrix of  
442 combinations of the number of genes and gene signatures was formed. The matrix was  
443 compressed to a low dimension by the skip-gram model using negative sampling for the  
444 co-occurrence probability of genes that appeared simultaneously in the gene signature. It was  
445 then designated as a gene vector. Fig 2 presents  $gv_i$ , a vector of an arbitrary gene  $g_i$ .

446 The number of dimensions to be compressed (i.e., gene vector length) and the number of  
447 learning iterations (epoch number) had to be adjusted according to the number of vocabularies  
448 in the NLP analysis. Because of the advanced analysis, the number of dimensions was set to  
449 150 and the number of epochs to 100 (see S1 and S2 Figs). The above operations can be  
450 executed in one step as an original R function, *gs.train\_genevec*.

451

### 452 **Creation of gene-topic vectors**



453 Topics (clusters) included in these gene signatures were extracted from the created gene  
454 vector by soft clustering using the Gaussian mixture model (GMM). For the GMM analysis,  
455 *mclust* of the R *mclust* package [16] was used, and the number of clusters was estimated using  
456 the *mclustBIC* function. The GMM analysis was performed by the *mclust* function with the  
457 number of clusters determined by the Bayesian information criterion (BIC), and the  
458 probability that each gene contributed to each cluster was calculated. This probability was  
459 multiplied for each cluster by the previous gene vector to obtain a gene-cluster vector. Fig 2  
460 demonstrates  $gcv_{ik} = gv_i \times P(c_k | g_i)$ , where  $c$  represents a cluster and  $K$  represents the  
461 number of clusters.

462 Separately, a score to reduce the weight of genes that appeared in various signatures was  
463 calculated by determining the value obtained by dividing the total number of signatures for  
464 each gene by the number of signatures that contained the gene from the one-hot vector of the  
465 genes  $\times$  gene signatures (hereinafter referred to as the *inverse signature factor*). The following  
466 equation was expressed as a function of R as a countermeasure to infiniteness; when the gene  
467 was 0, the weights were normalized.

468 
$$isf(g_i) = \log \frac{S_N}{sf(g_i)} + 1$$

469 Here,  $S_N$  represents the total number of gene signatures, while  $Sf(g_i)$  represents the  
470 number of gene signatures including the gene  $g_i$ .

471 By multiplying this value by the previous gene-cluster vector, gene-topic vectors

472 reflecting the height of gene contribution to each topic and the gene specificity weight were  
473 calculated. Fig 2 displays  $gtv_i = isf(g_i) \times \bigoplus_{k=1}^K gcv_{ik}$ , where  $\bigoplus$  represents  
474 concatenation.

475 In addition, the *estimate\_cluster\_size* function for estimating the number of clusters from  
476 the gene vector and the *gs.train\_topicvec* function for creating the gene-cluster and gene-topic  
477 vectors were created, making executable in one step. The validation results of the parameters  
478 for estimating the number of clusters are presented in Supplemental Fig 3.

479

#### 480 **Creation of signature vector**

481 Training data or validation data were input to the generated gene-topic vectors, and the  
482 gene-topic vectors were averaged for the genes included in each gene signature. As a result,  
483 each signature-specific feature vector (hereinafter referred to as the signature vector) was  
484 created, taking into account the gene specificity and the relevance of the gene to the topic in  
485 the training data. Fig 2 demonstrates  $sv = \sum_{i=0}^j gtv_i$ . The above operation can be performed  
486 with an original function, *predict\_GsVec\_from.TopicVec*.

487 It should be noted that the original SCDV method of NLP, which is the basis of this  
488 method, can increase the speed and accuracy using the sparse method [9]. However, in gene  
489 signature analysis, the number of genes corresponding to the number of vocabularies is  
490 overwhelmingly small compared to natural language; thus, this step was excluded because the

491 above procedure neither increased speed nor improved accuracy.

492

### 493 **Association between signature vectors by GsVec**

494 The association between the signature data of the training and validation data was  
495 calculated based on the cosine similarity score of the signature vector. Depending on the  
496 combination of training and validation data, a large amount of computation is required; thus,  
497 the existing cosine distance function of the R package was not used, and high-speed program  
498 code was created by original matrix computation.

499 This operation can be performed with the original functions *similarity\_vectors* and  
500 *GSVEC*. However, while the former outputs minimal results, the latter is a comprehensive  
501 function with various options, such as adding annotations of the original signature and  
502 simultaneously outputting the results of Fisher.

503

### 504 **Conventional pathway enrichment analysis by Fisher's exact test**

505 Fisher's exact test created and implemented its own function, *gs.enrich\_fisher*, to  
506 perform comprehensive processing between gene signatures using the *fisher.test* function of  
507 the R stats package.

508

### 509 **Visualization of GsVec results with tSNE**

510 To visualize the similarity by the cosine distance between the signature vectors of  
511 GsVec, the cosine distance matrix was first linearly compressed with principal component  
512 analysis (PCA) using the *prcomp* function of the R stats package. The top 95% of the  
513 principal components were projected in two dimensions using the *Rtsne* function in the R  
514 Rtsne package [36] and visualized using the R ggplot2 package [37]. This series of operations  
515 can be executed with the original function *pca.tsne\_GsVec*.

516

#### 517 **Extraction of DEGs from public gene expression data**

518 The DEGs of representative diseases were selected from several datasets in which the gene  
519 expression of the appropriate disease site was used, and which was a representative disease  
520 from various disease areas among the already calculated DEGs published in the Expression  
521 Atlas [19]. With regard to cancer, the Expression Atlas did not provide an appropriate dataset;  
522 therefore, cancer tissue and matched normal tissue datasets of major cancer types were taken  
523 from the TCGA database [20]. TCGA data were normalized from the RNA-seq count data  
524 using the *voom* method in the R limma package, and statistically tested by the experimental  
525 Bayes method. DEGs with a false discovery rate -adjusted P-value of 0.001 or less and a fold  
526 change of  $\pm 2$  or more were extracted.

527

#### 528 **Publishing program codes**

529           The program code for the GsVec analysis developed in this study is freely available  
530 from <https://github.com/yuumio/GsVec>

531

## 532 **Acknowledgments**

533           We would like to show our greatest appreciation to Prof. Masami Hagiya, Dr. Rei  
534 Kawakami, and Dr. Toshiaki Nakazawa of the University of Tokyo AI Data Frontier Course  
535 who taught us about AI, machine learning, and NLP. We would like to offer special thanks to  
536 Dr. Shinichi Kondo and Dr. Shuji Sato for supporting this research. The authors would like to  
537 thank Enago ([www.enago.jp](http://www.enago.jp)) for the English language review.

538

## 539 **References**

- 540 1. Edgar R, Domrachev M, Lash AE. Gene Expression Omnibus: NCBI gene expression  
541 and hybridization array data repository. *Nucleic Acids Res.* 2002 Jan 1;30(1):207-10.
- 542 2. Jin L, Zuo XY, Su WY, Zhao XL, Yuan MQ, et al. Pathway-based Analysis Tools for  
543 Complex Diseases: A Review. *Genomics Proteomics Bioinformatics.* 2014  
544 Oct;12(5):210-20.
- 545 3. Subramanian A, Tamayo P, Mootha VK, Mukherjee S, Ebert BL, Gillette MA, et al.  
546 Gene set enrichment analysis: a knowledge-based approach for interpreting genome-wide  
547 expression profiles. *Proc Natl Acad Sci U S A.* 2005 Oct 25;102(43):15545-50.

- 548 4. Huang da W, Sherman BT, Lempicki RA. Bioinformatics enrichment tools: paths toward  
549 the comprehensive functional analysis of large gene lists". *Nucleic Acids Res.* 2009  
550 Jan;37(1):1-13.
- 551 5. Glaab E, Baudot A, Krasnogor N, Schneider R, Valencia A. EnrichNet: network-based  
552 gene set enrichment analysis. *Bioinformatics.* 2012 Sep 15;28(18):i451-i457.
- 553 6. Quoc Le, Tomas Mikolov. Distributed Representations of Sentences and Documents.  
554 PMLR. 2014 32(2):1188-96.
- 555 7. Jey Han Lau, Timothy Baldwin. An Empirical Evaluation of doc2vec with Practical  
556 Insights into Document Embedding Generation. arXiv:1607.05368v1. (Submitted on 19  
557 Jul 2016) Available from: <https://arxiv.org/abs/1607.05368v1>
- 558 8. Andrew M Dai, Christopher Olah, Quoc V Le. Document Embedding with Paragraph  
559 Vectors. arXiv:1507.07998v1. (Submitted on 29 Jul 2015) Available from:  
560 <https://arxiv.org/abs/1507.07998v1>
- 561 9. Dheeraj Mekala, Vivek Gupta, Bhargavi Paranjape, Harish Karnick. SCDV: Sparse  
562 Composite Document Vectors using soft clustering over distributional representations.  
563 arXiv:1612.06778v3. (Submitted on 20 Dec 2016 (v1), last revised 12 May 2017 (this  
564 version, v3)) Available from: <https://arxiv.org/abs/1612.06778v3>
- 565 10. Stephen Robertson. Understanding inverse document frequency: on theoretical arguments  
566 for IDF. *Journal of Documentation.* 2004 October 60(5):503-20.

- 567 11. Tomas Mikolov, Kai Chen, Greg Corrado, Jeffrey Dean. Efficient Estimation of Word  
568 Representations in Vector Space. arXiv:1301.3781v3. (Submitted on 16 Jan 2013 (v1),  
569 last revised 7 Sep 2013 (this version, v3)) Available from:  
570 <https://arxiv.org/abs/1301.3781v3>
- 571 12. Richard Socher, Alex Perelygin, Jean Wu, Jason Chuang, Chris Manning, et al. Recursive  
572 deep models for semantic compositionality over a sentiment treebank. Empirical methods  
573 in NLP, 1631, 1642. 2013.
- 574 13. Liberzon A, Birger C, Thorvaldsdóttir H, Ghandi M, Mesirov JP, Tamayo P. The  
575 Molecular Signatures Database (MSigDB) hallmark gene set collection. Cell Syst. 2015  
576 Dec 23;1(6):417-25.
- 577 14. Piotr Bojanowski, Edouard Grave, Armand Joulin, Tomas Mikolov. Enriching Word  
578 Vectors with Subword Information. arXiv:1607.04606v2. (Submitted on 15 Jul 2016  
579 (v1), last revised 19 Jun 2017 (this version, v2)) Available from:  
580 <https://arxiv.org/abs/1607.04606v2>
- 581 15. Chris Fraley, Adrian E Raftery. Bayesian regularization for normal mixture estimation  
582 and model-based clustering. Journal of Classification. 2007, 24, Issue 2, pp 155–81.
- 583 16. Scrucca L, Fop M, Murphy TB, Raftery AE. mclust 5: clustering, classification and  
584 density estimation using Gaussian finite mixture models. R J. 2016 Aug;8(1):289-317.
- 585 17. Ashok Koujalagi. Determine Word Relevance in Document Queries Using TF-IDF.

- 586 International Journal of Scientific Research. 2015, 4: 8.
- 587 18. van der Maaten, LJP, Hinton, GE. Visualizing High-Dimensional Data Using t-SNE.  
588 Journal of Machine Learning Research. 2008. 9(nov), 2579-2605.
- 589 19. Petryszak R, Keays M, Tang YA, Fonseca NA, Barrera E, Burdett T, et al. Expression  
590 Atlas update—an integrated database of gene and protein expression in humans, animals  
591 and plants. Nucleic Acids Res. 2016 Jan 4;44(D1):D746-52.
- 592 20. The Cancer Genome Atlas Network. Comprehensive molecular portraits of human breast  
593 tumours. Nature. 2012 Oct 4;490(7418):61-70.
- 594 21. Li R, Patterson KR, Bar-Or A. Reassessing B cell contributions in multiple sclerosis. Nat  
595 Immunol. 2018 Jul;19(7):696-707.
- 596 22. Greenfield AL, Hauser SL. B-cell Therapy for Multiple Sclerosis: Entering an era. Ann  
597 Neurol. 2018 Jan;83(1):13-26.
- 598 23. Zundler S, Becker E, Schulze LL, Neurath MF. Immune cell trafficking and retention in  
599 inflammatory bowel disease: mechanistic insights and therapeutic advances. Gut. 2019  
600 Sep;68(9):1688-1700.
- 601 24. Kuenzig ME, Barnabe C, Seow CH, Eksteen B, Negron ME, et al. Asthma Is Associated  
602 With Subsequent Development of Inflammatory Bowel Disease: A Population-based  
603 Case-Control Study. Clin Gastroenterol Hepatol. 2017 Sep;15(9):1405-12.e3.
- 604 25. Eguchi K, Nagai R. Islet inflammation in type 2 diabetes and physiology. J Clin Invest.



605 2017 Jan 3;127(1):14-23.

606 26. Falanga V. Wound healing and its impairment in the diabetic foot. *Lancet*. 2005 Nov

607 12;366(9498):1736-43.

608 27. Kimball AS, Davis FM, denDekker A, Joshi AD, Schaller MA, et al. The Histone

609 Methyltransferase Setdb2 Modulates Macrophage Phenotype and Uric Acid Production in

610 Diabetic Wound Repair. *Immunity*. 2019 Aug 20;51(2):258-71.e5.

611 28. Ogura Y, Tajrishi MM, Sato S, Hindi SM, Kumar A. Therapeutic potential of matrix

612 metalloproteinases in Duchenne muscular dystrophy. *Front Cell Dev Biol*. 2014 Apr

613 1;2:11.

614 29. Shi S, de Gorter DJ, Hoogaars WM, 't Hoen PA, ten Dijke P. Overactive bone

615 morphogenetic protein signaling in heterotopic ossification and Duchenne muscular

616 dystrophy. *Cell Mol Life Sci*. 2013 Feb;70(3):407-23.

617 30. Crouser ED, Culver DA, Knox KS, Julian MW, Shao G, Abraham S, et al. Gene

618 expression profiling identifies MMP-12 and ADAMDEC1 as potential pathogenic

619 mediators of pulmonary sarcoidosis. *Am J Respir Crit Care Med*. 2009 May

620 15;179(10):929-38.

621 31. Rastogi R, Du W, Ju D, Pirockinaite G, Liu Y, Nunez G, Samavati L. Dysregulation of

622 p38 and MKP-1 in response to NOD1/TLR4 stimulation in sarcoid bronchoalveolar cells.

623 *Am J Respir Crit Care Med*. 2011 Feb 15;183(4):500-10.

- 624 32. Grunewald J, Spagnolo P, Wahlström J, Eklund A. Immunogenetics of Disease-Causing  
625 Inflammation in Sarcoidosis. *Clin Rev Allergy Immunol*. 2015 Aug;49(1):19-35.
- 626 33. McCutcheon RA, Abi-Dargham A, Howes OD. Schizophrenia, Dopamine and the  
627 Striatum: From Biology to Symptoms. *Trends Neurosci*. 2019 Mar;42(3):205-220.
- 628 34. Ruth Fong, Andrea Vedaldi. Interpretable Explanations of Black Boxes by Meaningful  
629 Perturbation. arXiv:1704.03296v3. (Submitted on 11 Apr 2017 (v1), last revised 10 Jan  
630 2018 (this version, v3)) Available from: <https://arxiv.org/abs/1704.03296v3>
- 631 35. Schwendinger F. fastTextR: An Interface to the 'fastText' Library. R CRAN 2017
- 632 36. Krijthe, J. H. Rtsne: T-Distributed Stochastic Neighbor Embedding using Barnes-Hut  
633 Implementation. 2015. Available from: <https://github.com/jkrijthe/Rtsne>
- 634 37. Wickham H. ggplot2: Elegant Graphics for Data Analysis. Springer-Verlag New York.  
635 2016
- 636 38. Ritchie ME, Phipson B, Wu D, Hu Y, Law CW, et al. limma powers differential  
637 expression analyses for RNA-sequencing and microarray studies. *Nucleic Acids Res*.  
638 2015 Apr 20;43(7):e47.

639

## 640 **Supporting information**

641 **S1 Fig. Examination of dimensionality condition in gene vectors.** Gene vectors were  
642 created for five vector sizes of the gene vectors: 50, 100, 150, 200, and 250. A) Similarity

643 with the validation data was calculated. The distribution is illustrated in a violin plot, while  
644 the Fisher result is presented in a scatter plot. B) The Pearson correlation coefficient with  
645 Fisher for each vector size is presented as a bar graph.

646

647 **S2 Fig. Examination of epoch number in gene vectors.** Gene vectors were created for 16  
648 levels: 1, 5, 10, 15, 20, 30, 40, 50, 75, 100, 250, 500, 1,000, 1,500, and 2,000. A) Similarity  
649 with the validation data was calculated. The distribution is presented in a violin plot, while the  
650 Fisher result is presented in a scatter plot. B) The Pearson correlation coefficient with Fisher  
651 for each vector size is illustrated as a bar graph.

652

653 **S3 Fig. Validation of parameters for estimating the number of clusters as topics in gene**  
654 **signatures.** The output of the *mclustBIC* function of the R *mclust* package was visualized by  
655 the *plot* function. The Bayesian information criterion in the *mclust* package is  $2 \times \log$   
656 likelihood. Thus, the largest value was selected as the optimal cluster.

657

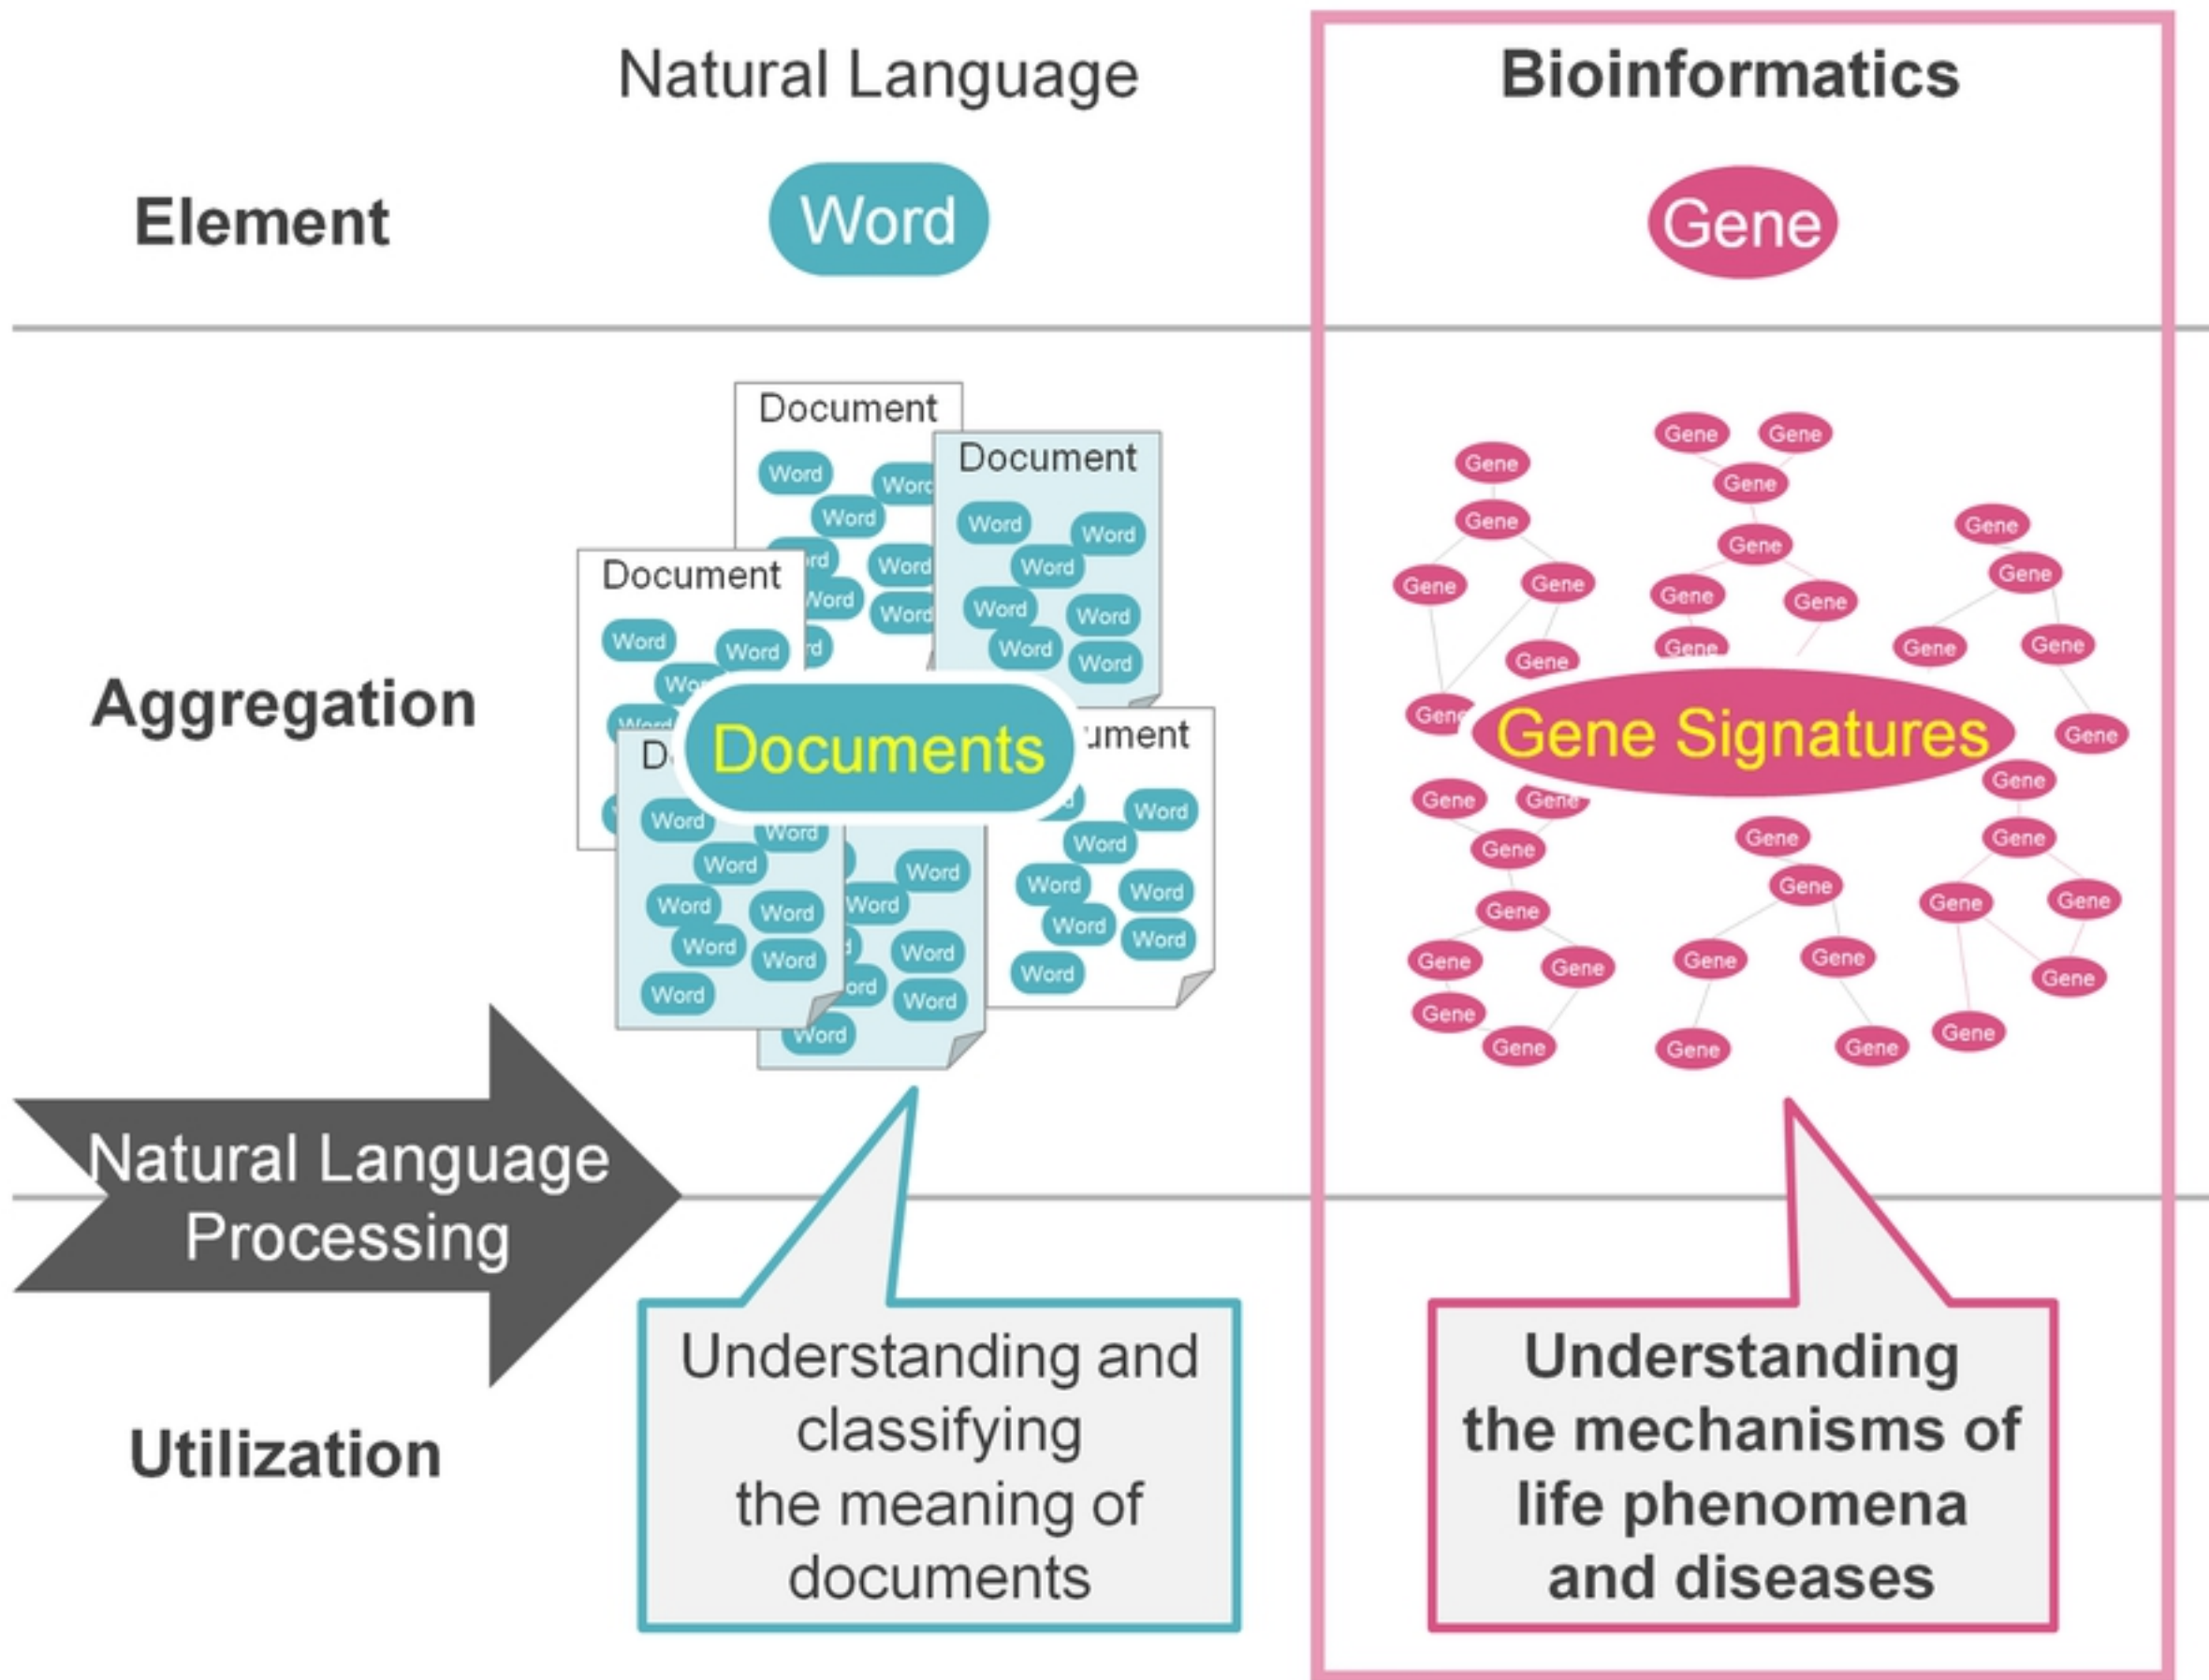

Figure 1

Preparation

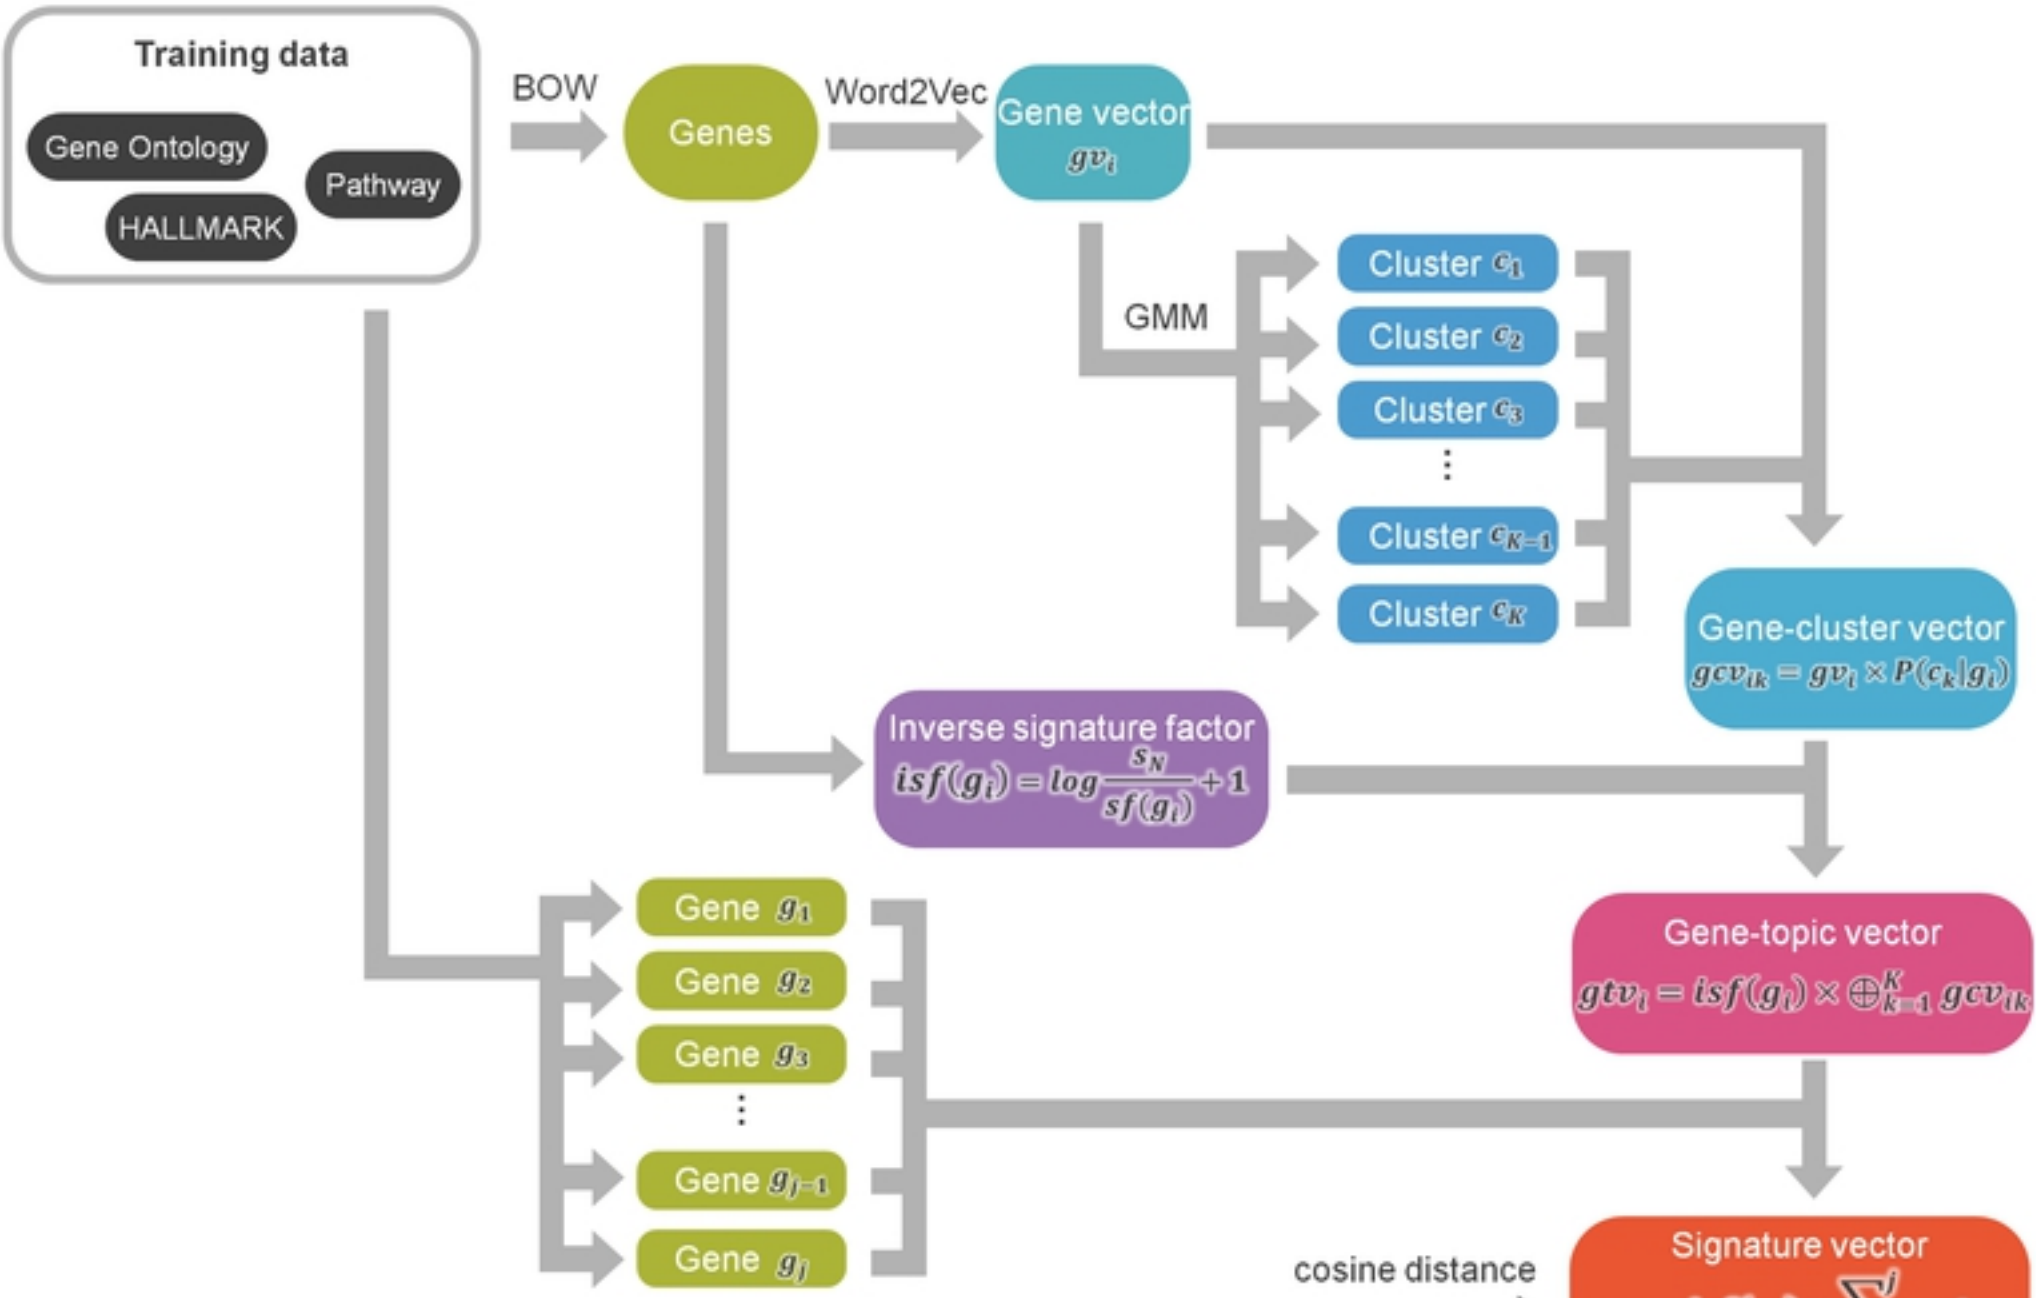

Analysis

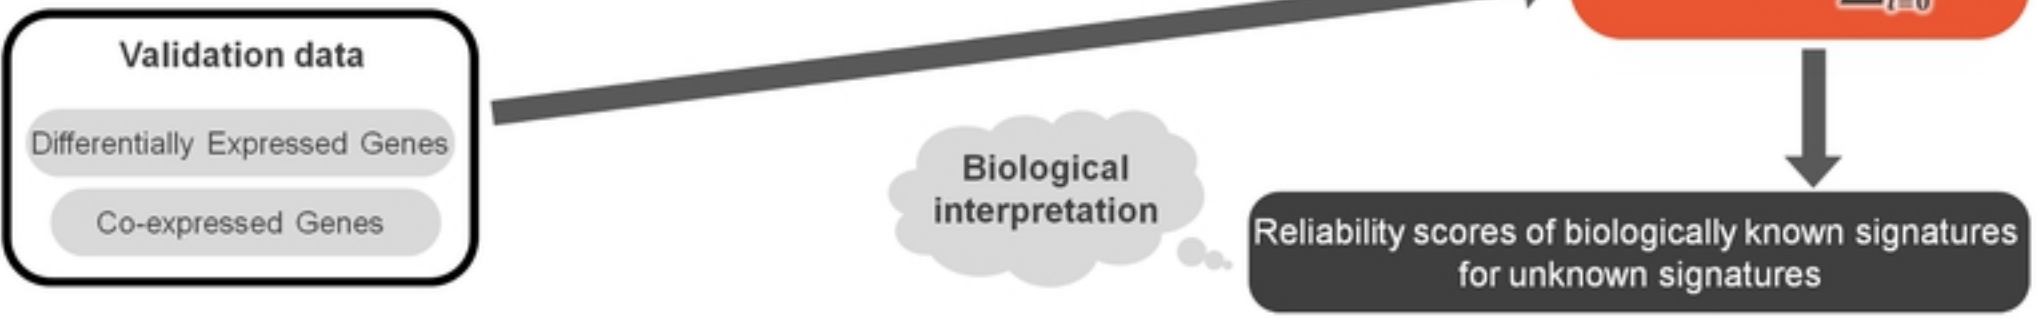

Figure 2

A

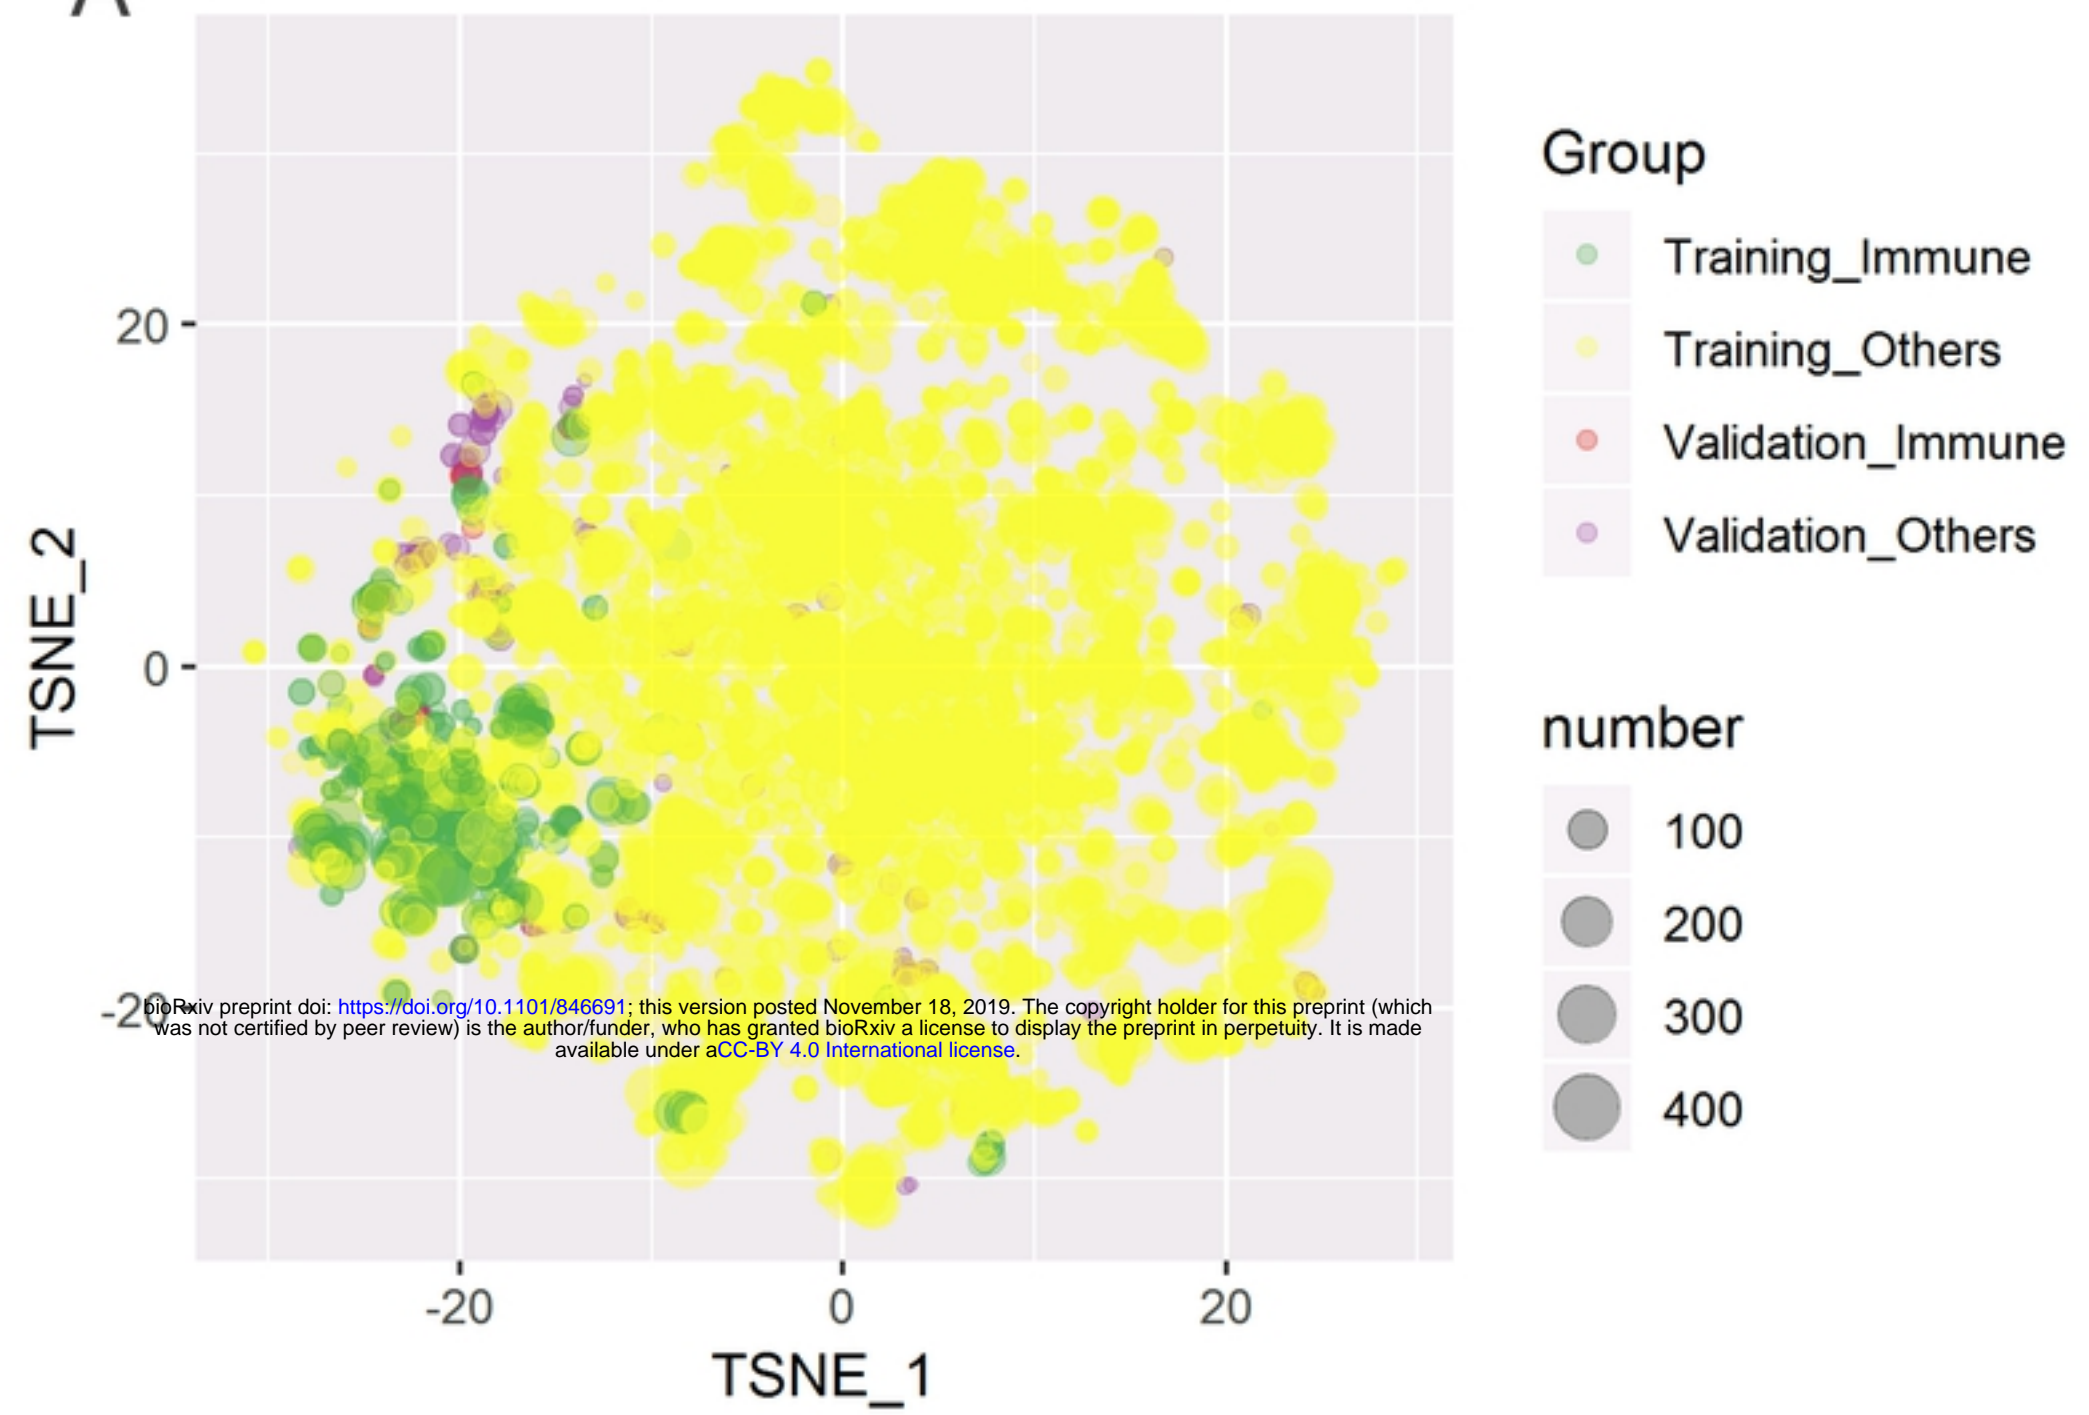

B

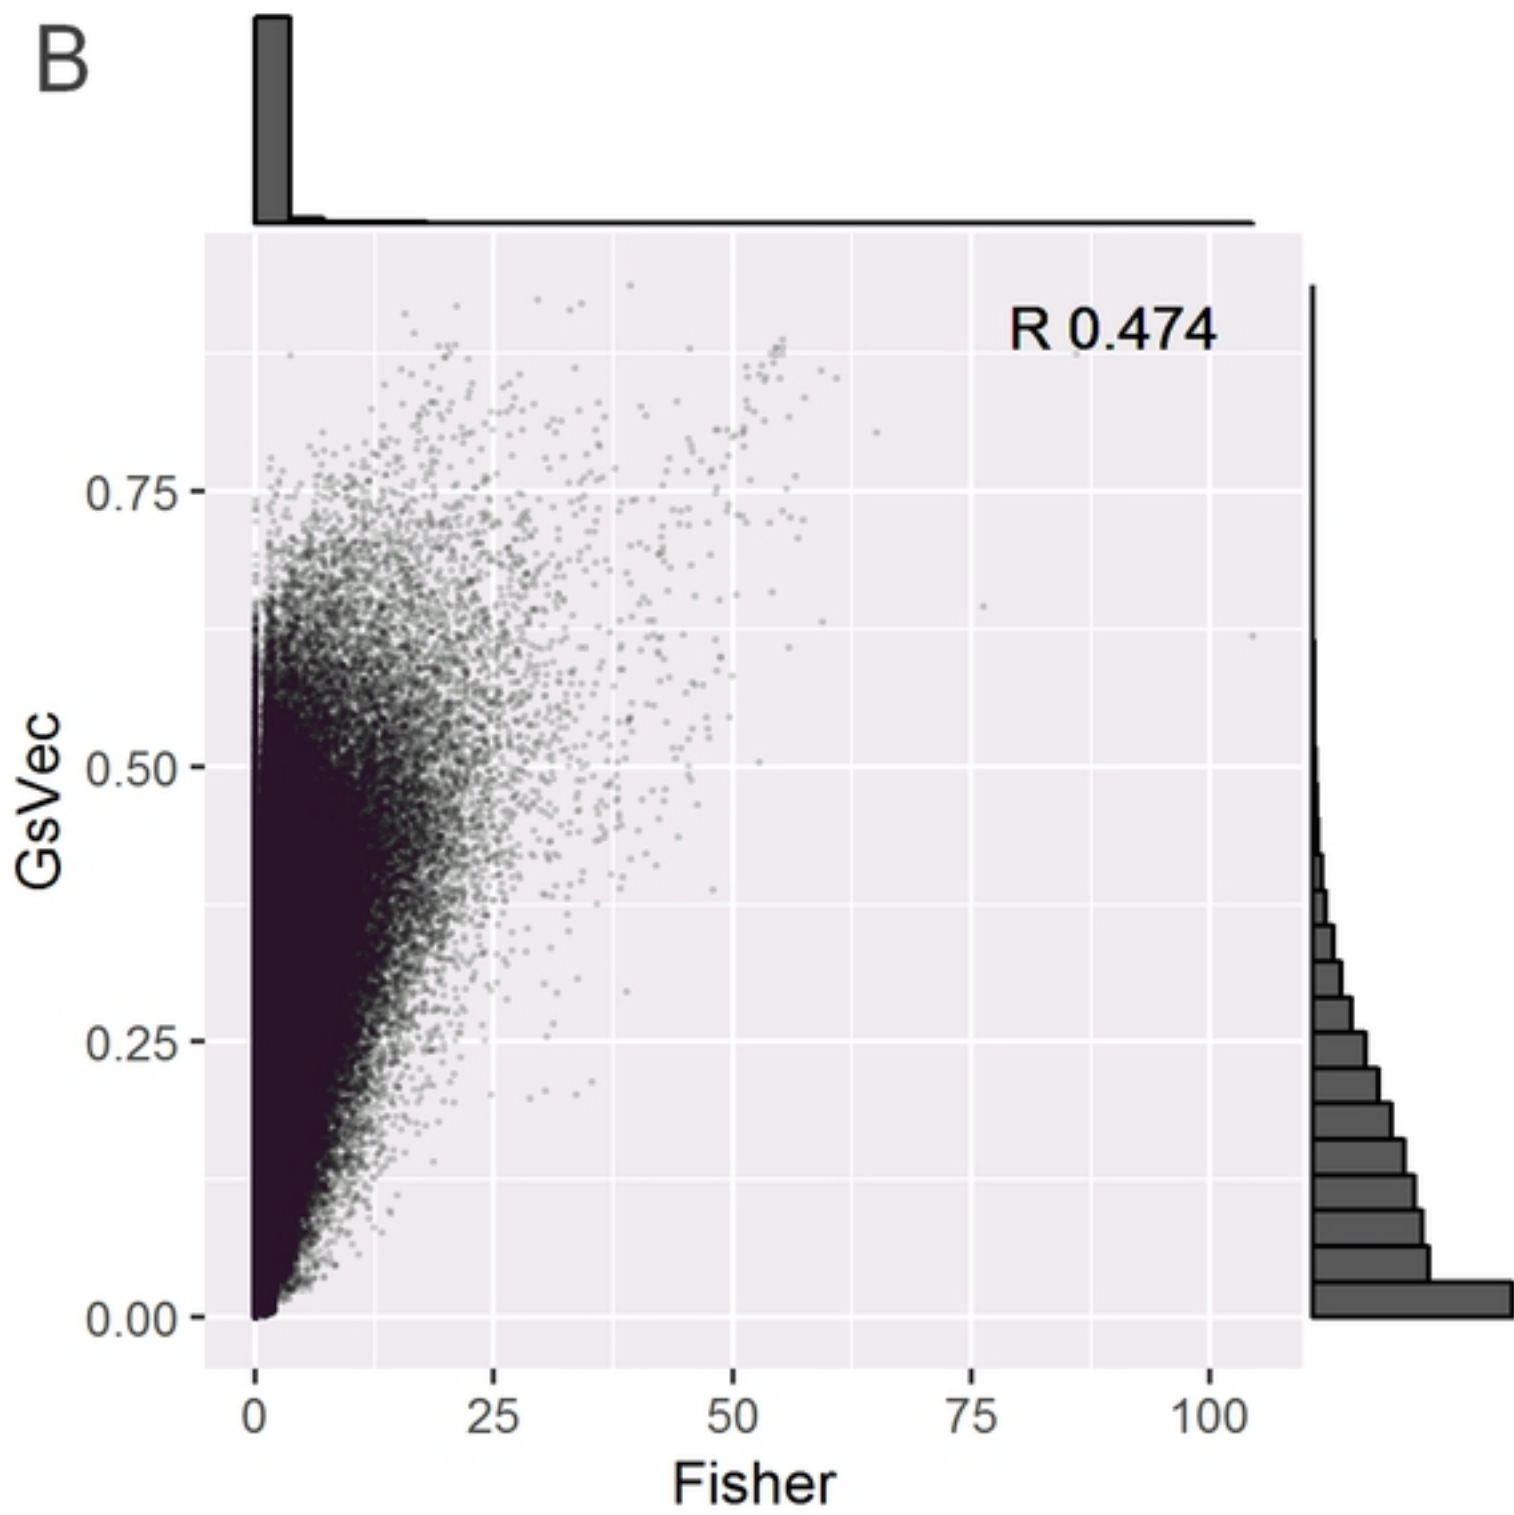

Figure 3

## BIOCARTA\_IL1R\_PATHWAY (33 genes)

### GsVec

| Training gene signature name                                                               | Genes | Overlap | GsVec |
|--------------------------------------------------------------------------------------------|-------|---------|-------|
| PID_IL1_PATHWAY                                                                            | 34    | 19      | 0.833 |
| REACTOME_IL1_SIGNALING                                                                     | 39    | 16      | 0.824 |
| REACTOME_SIGNALING_BY_ILS                                                                  | 107   | 18      | 0.781 |
| KEGG_TOLL_LIKE_RECEPTOR_SIGNALING_PATHWAY                                                  | 102   | 21      | 0.733 |
| KEGG_LEISHMANIA_INFECTION                                                                  | 72    | 16      | 0.710 |
| REACTOME_JNK_C_JUN_KINASES_PHOSPHORYLATION_AND_ACTIVATION_MEDIATED_BY_ACTIVATED_HUMAN_TAK1 | 16    | 6       | 0.701 |
| REACTOME_CYTOKINE_SIGNALING_IN_IMMUNE_SYSTEM                                               | 270   | 20      | 0.692 |
| KEGG_RIG_I_LIKE_RECEPTOR_SIGNALING_PATHWAY                                                 | 71    | 13      | 0.689 |
| REACTOME_ACTIVATED_TAK1_MEDIATES_P38_MAPK_ACTIVATION                                       | 18    | 8       | 0.683 |
| GO_INTERLEUKIN_1_MEDIATED_SIGNALING_PATHWAY                                                | 13    | 6       | 0.668 |
| GO_CYTOPLASMIC_PATTERN_RECOGNITION_RECEPTOR_SIGNALING_PATHWAY                              | 33    | 10      | 0.660 |
| REACTOME_ACTIVATED_TLR4_SIGNALLING                                                         | 93    | 18      | 0.645 |
| GO_CYTOKINE_MEDIATED_SIGNALING_PATHWAY                                                     | 452   | 15      | 0.640 |
| GO_LIPOPOLYSACCHARIDE_MEDIATED_SIGNALING_PATHWAY                                           | 31    | 7       | 0.634 |
| REACTOME_TRIF_MEDIATED_TLR3_SIGNALING                                                      | 74    | 14      | 0.633 |

## BIOCARTA\_BCR\_PATHWAY (37 genes)

### GsVec

| Training gene signature name                                                          | Genes | Overlap | GsVec |
|---------------------------------------------------------------------------------------|-------|---------|-------|
| KEGG_B_CELL_RECEPTOR_SIGNALING_PATHWAY                                                | 75    | 24      | 0.767 |
| PID_BCR_5PATHWAY                                                                      | 65    | 24      | 0.733 |
| KEGG_T_CELL_RECEPTOR_SIGNALING_PATHWAY                                                | 108   | 18      | 0.673 |
| PID_FCER1_PATHWAY                                                                     | 62    | 18      | 0.608 |
| REACTOME_ANTIGEN_ACTIVATES_B_CELL_RECEPTOR_LEADING_TO_GENERATION_OF_SECOND_MESSENGERS | 29    | 14      | 0.608 |
| KEGG_VEGF_SIGNALING_PATHWAY                                                           | 76    | 16      | 0.606 |
| PID_NFAT_3PATHWAY                                                                     | 54    | 11      | 0.569 |
| PID_AVB3_OPN_PATHWAY                                                                  | 31    | 7       | 0.564 |
| KEGG_GNRH_SIGNALING_PATHWAY                                                           | 101   | 16      | 0.562 |
| PID_ERBB2_ERBB3_PATHWAY                                                               | 44    | 13      | 0.557 |
| KEGG_FC_EPSILON_RI_SIGNALING_PATHWAY                                                  | 79    | 16      | 0.543 |
| KEGG_MAPK_SIGNALING_PATHWAY                                                           | 267   | 20      | 0.541 |
| PID_VEGFR1_2_PATHWAY                                                                  | 69    | 8       | 0.540 |
| GO_CALCIUM_MEDIATED_SIGNALING                                                         | 90    | 10      | 0.530 |
| PID_TCR_CALCIUM_PATHWAY                                                               | 29    | 7       | 0.526 |

## BIOCARTA\_TOLL\_PATHWAY (37 genes)

### GsVec

| Training gene signature name                                                               | Genes | Overlap | GsVec |
|--------------------------------------------------------------------------------------------|-------|---------|-------|
| REACTOME_TOLL_RECEPTOR_CASCADES                                                            | 118   | 31      | 0.853 |
| REACTOME_ACTIVATED_TLR4_SIGNALLING                                                         | 93    | 28      | 0.817 |
| GO_MYD88_DEPENDENT_TOLL_LIKE_RECEPTOR_SIGNALING_PATHWAY                                    | 32    | 16      | 0.784 |
| GO_PATTERN_RECOGNITION_RECEPTOR_SIGNALING_PATHWAY                                          | 109   | 24      | 0.769 |
| REACTOME_MYD88_MAL_CASCADE_INITIATED_ON_PLASMA_MEMBRANE                                    | 83    | 26      | 0.760 |
| GO_TOLL_LIKE_RECEPTOR_SIGNALING_PATHWAY                                                    | 85    | 21      | 0.741 |
| REACTOME_TRAF6_MEDIATED_INDUCION_OF_NFKB_AND_MAP_KINASES_UPON_TLR7_8_OR_9_ACTIVATION       | 77    | 23      | 0.733 |
| KEGG_TOLL_LIKE_RECEPTOR_SIGNALING_PATHWAY                                                  | 102   | 29      | 0.724 |
| REACTOME_NFKB_AND_MAP_KINASES_ACTIVATION_MEDIATED_BY_TLR4_SIGNALING_REPERTOIRE             | 72    | 22      | 0.719 |
| REACTOME_TRAF6_MEDIATED_INDUCION_OF_TAK1_COMPLEX                                           | 14    | 8       | 0.708 |
| GO_I_KAPPAB_KINASE_NF_KAPPAB_SIGNALING                                                     | 70    | 16      | 0.707 |
| REACTOME_IKK_COMPLEX_RECRUITMENT_MEDIATED_BY_RIP1                                          | 10    | 7       | 0.707 |
| REACTOME_JNK_C_JUN_KINASES_PHOSPHORYLATION_AND_ACTIVATION_MEDIATED_BY_ACTIVATED_HUMAN_TAK1 | 16    | 8       | 0.701 |
| REACTOME_TRIF_MEDIATED_TLR3_SIGNALING                                                      | 74    | 19      | 0.700 |
| REACTOME_ACTIVATED_TAK1_MEDIATES_P38_MAPK_ACTIVATION                                       | 18    | 9       | 0.698 |

### Fisher

| Training gene signature name                                                         | Genes | Overlap | Fisher |
|--------------------------------------------------------------------------------------|-------|---------|--------|
| PID_IL1_PATHWAY                                                                      | 34    | 19      | 44.145 |
| KEGG_TOLL_LIKE_RECEPTOR_SIGNALING_PATHWAY                                            | 102   | 21      | 38.021 |
| REACTOME_IL1_SIGNALING                                                               | 39    | 16      | 33.915 |
| REACTOME_MYD88_MAL_CASCADE_INITIATED_ON_PLASMA_MEMBRANE                              | 83    | 18      | 32.558 |
| REACTOME_ACTIVATED_TLR4_SIGNALLING                                                   | 93    | 18      | 31.573 |
| REACTOME_TRAF6_MEDIATED_INDUCION_OF_NFKB_AND_MAP_KINASES_UPON_TLR7_8_OR_9_ACTIVATION | 77    | 17      | 30.765 |
| KEGG_MAPK_SIGNALING_PATHWAY                                                          | 267   | 22      | 30.734 |
| REACTOME_SIGNALING_BY_ILS                                                            | 107   | 18      | 30.377 |
| REACTOME_TOLL_RECEPTOR_CASCADES                                                      | 118   | 18      | 29.552 |
| KEGG_LEISHMANIA_INFECTION                                                            | 72    | 16      | 28.893 |
| REACTOME_CYTOKINE_SIGNALING_IN_IMMUNE_SYSTEM                                         | 270   | 20      | 26.602 |
| REACTOME_INNATE_IMMUNE_SYSTEM                                                        | 279   | 20      | 26.311 |
| KEGG_APOPTOSIS                                                                       | 88    | 15      | 25.092 |
| REACTOME_NFKB_AND_MAP_KINASES_ACTIVATION_MEDIATED_BY_TLR4_SIGNALING_REPERTOIRE       | 72    | 14      | 24.211 |
| REACTOME_TRIF_MEDIATED_TLR3_SIGNALING                                                | 74    | 14      | 24.029 |

bioRxiv preprint doi: <https://doi.org/10.1101/846601>; this version posted November 18, 2019. The copyright holder for this preprint (which was not certified by peer review) is the author/funder, who has granted bioRxiv a license to display the preprint in perpetuity. It is made available under aCC-BY 4.0 International license.

### Fisher

| Training gene signature name                                                          | Genes | Overlap | Fisher |
|---------------------------------------------------------------------------------------|-------|---------|--------|
| PID_BCR_5PATHWAY                                                                      | 65    | 24      | 49.372 |
| KEGG_B_CELL_RECEPTOR_SIGNALING_PATHWAY                                                | 75    | 24      | 47.563 |
| GO_FC_EPSILON_RECEPTOR_SIGNALING_PATHWAY                                              | 142   | 23      | 37.698 |
| GO_IMMUNE_RESPONSE_REGULATING_CELL_SURFACE_RECEPTOR_SIGNALING_PATHWAY                 | 323   | 27      | 37.115 |
| PID_FCER1_PATHWAY                                                                     | 62    | 18      | 33.929 |
| GO_FC_RECEPTOR_SIGNALING_PATHWAY                                                      | 206   | 23      | 33.742 |
| KEGG_NATURAL_KILLER_CELL_MEDIATED_CYTOTOXICITY                                        | 137   | 20      | 31.337 |
| REACTOME_ANTIGEN_ACTIVATES_B_CELL_RECEPTOR_LEADING_TO_GENERATION_OF_SECOND_MESSENGERS | 29    | 14      | 29.904 |
| KEGG_T_CELL_RECEPTOR_SIGNALING_PATHWAY                                                | 108   | 18      | 29.076 |
| KEGG_VEGF_SIGNALING_PATHWAY                                                           | 76    | 16      | 27.438 |
| KEGG_FC_EPSILON_RI_SIGNALING_PATHWAY                                                  | 79    | 16      | 27.141 |
| PID_CD8_TCR_DOWNSTREAM_PATHWAY                                                        | 65    | 15      | 26.315 |
| KEGG_MAPK_SIGNALING_PATHWAY                                                           | 267   | 20      | 25.286 |
| KEGG_GNRH_SIGNALING_PATHWAY                                                           | 101   | 16      | 25.283 |
| PID_ERBB2_ERBB3_PATHWAY                                                               | 44    | 13      | 24.290 |

### Fisher

| Training gene signature name                                                         | Genes | Overlap | Fisher |
|--------------------------------------------------------------------------------------|-------|---------|--------|
| REACTOME_TOLL_RECEPTOR_CASCADES                                                      | 118   | 31      | 60.853 |
| KEGG_TOLL_LIKE_RECEPTOR_SIGNALING_PATHWAY                                            | 102   | 29      | 57.292 |
| REACTOME_ACTIVATED_TLR4_SIGNALLING                                                   | 93    | 28      | 55.790 |
| REACTOME_MYD88_MAL_CASCADE_INITIATED_ON_PLASMA_MEMBRANE                              | 83    | 26      | 51.755 |
| REACTOME_INNATE_IMMUNE_SYSTEM                                                        | 279   | 31      | 48.165 |
| REACTOME_TRAF6_MEDIATED_INDUCION_OF_NFKB_AND_MAP_KINASES_UPON_TLR7_8_OR_9_ACTIVATION | 77    | 23      | 44.558 |
| GO_PATTERN_RECOGNITION_RECEPTOR_SIGNALING_PATHWAY                                    | 109   | 24      | 43.070 |
| REACTOME_NFKB_AND_MAP_KINASES_ACTIVATION_MEDIATED_BY_TLR4_SIGNALING_REPERTOIRE       | 72    | 22      | 42.688 |
| GO_TOLL_LIKE_RECEPTOR_SIGNALING_PATHWAY                                              | 85    | 21      | 38.336 |
| GO_ACTIVATION_OF_INNATE_IMMUNE_RESPONSE                                              | 204   | 25      | 38.197 |
| GO_POSITIVE_REGULATION_OF_INNATE_IMMUNE_RESPONSE                                     | 246   | 25      | 36.060 |
| REACTOME_TRIF_MEDIATED_TLR3_SIGNALING                                                | 74    | 19      | 34.770 |
| GO_MYD88_DEPENDENT_TOLL_LIKE_RECEPTOR_SIGNALING_PATHWAY                              | 32    | 16      | 34.669 |
| GO_REGULATION_OF_INNATE_IMMUNE_RESPONSE                                              | 357   | 25      | 31.880 |
| GO_POSITIVE_REGULATION_OF_DEFENSE_RESPONSE                                           | 364   | 25      | 31.664 |

Figure 4

| Disease                            | Tissue                 | Dataset                   | up  | down |
|------------------------------------|------------------------|---------------------------|-----|------|
| Multiple sclerosis (MS)            | Cerebrospinal fluid    | E-MTAB-69                 | 15  | 59   |
| Crohn Disease (CD)                 | Colon                  | E-MEXP-2083, E-GEOD-59071 | 55  | 6    |
| Type2 diabetes (T2D)               | islet of Langerhans    | E-MTAB-5060, E-MEXP-1878  | 80  | 15   |
| Duchenne muscular dystrophy (DMD)  | skeletal muscle        | E-GEOD-3307               | 153 | 13   |
| Systemic lupus erythematosus (SLE) | whole blood            | E-GEOD-72509              | 606 | 89   |
| Sarcoidosis                        | lung                   | E-GEOD-16538              | 165 | 34   |
| Schizophrenia (SCZ)                | Brain Brodmann area 24 | E-GEOD-78936              | 224 | 295  |

Figure 5



## MS (up)

### GsVec

| Training gene signature name                                                                                                 | Genes | Overlap | GsVec |
|------------------------------------------------------------------------------------------------------------------------------|-------|---------|-------|
| GO_POSITIVE_REGULATION_OF_B_CELL_ACTIVATION                                                                                  | 323   | 6       | 6.426 |
| GO_B_CELL_RECEPTOR_SIGNALING_PATHWAY                                                                                         | 54    | 3       | 0.699 |
| GO_REGULATION_OF_B_CELL_ACTIVATION                                                                                           | 121   | 4       | 0.694 |
| GO_PHAGOCYTOSIS_ENGULFMENT                                                                                                   | 38    | 2       | 0.678 |
| GO_PHAGOCYTOSIS_RECOGNITION                                                                                                  | 34    | 2       | 0.673 |
| GO_MEMBRANE_INVAGINATION                                                                                                     | 48    | 2       | 0.651 |
| GO_B_CELL_MEDIATED_IMMUNITY                                                                                                  | 99    | 4       | 0.636 |
| GO_HUMORAL_IMMUNE_RESPONSE_MEDIATED_BY_CIRCULATING_IMMUNOGLOBULIN                                                            | 69    | 4       | 0.632 |
| GO_POSITIVE_REGULATION_OF_CELL_ACTIVATION                                                                                    | 311   | 4       | 0.616 |
| GO_COMPLEMENT_ACTIVATION                                                                                                     | 76    | 4       | 0.613 |
| GO_ADAPTIVE_IMMUNE_RESPONSE_BASED_ON_SOMATIC_RECOMBINATION_OF_IMMUNE_RECEPTORS_BUILT_FROM_IMMUNOGLOBULIN_SUPERFAMILY_DOMAINS | 154   | 4       | 0.612 |
| GO_HUMORAL_IMMUNE_RESPONSE                                                                                                   | 187   | 5       | 0.612 |
| GO_LYMPHOCYTE_MEDIATED_IMMUNITY                                                                                              | 147   | 4       | 0.606 |
| GO_ADAPTIVE_IMMUNE_RESPONSE                                                                                                  | 288   | 5       | 0.594 |
| GO_LEUKOCYTE_MEDIATED_IMMUNITY                                                                                               | 189   | 4       | 0.581 |

### Fisher

| Training gene signature name                                                                                                 | Genes | Overlap | Fisher |
|------------------------------------------------------------------------------------------------------------------------------|-------|---------|--------|
| GO_IMMUNE_RESPONSE_REGULATING_CELL_SURFACE_RECEPTOR_SIGNALING_PATHWAY                                                        | 323   | 6       | 6.426  |
| GO_HUMORAL_IMMUNE_RESPONSE_MEDIATED_BY_CIRCULATING_IMMUNOGLOBULIN                                                            | 69    | 4       | 6.291  |
| GO_HUMORAL_IMMUNE_RESPONSE                                                                                                   | 187   | 5       | 6.138  |
| GO_COMPLEMENT_ACTIVATION                                                                                                     | 76    | 4       | 6.121  |
| GO_PROTEIN_ACTIVATION_CASCADE                                                                                                | 99    | 4       | 5.66   |
| GO_B_CELL_MEDIATED_IMMUNITY                                                                                                  | 99    | 4       | 5.66   |
| GO_REGULATION_OF_B_CELL_ACTIVATION                                                                                           | 121   | 4       | 5.312  |
| GO_ADAPTIVE_IMMUNE_RESPONSE                                                                                                  | 288   | 5       | 5.217  |
| GO_LYMPHOCYTE_MEDIATED_IMMUNITY                                                                                              | 147   | 4       | 4.976  |
| GO_ADAPTIVE_IMMUNE_RESPONSE_BASED_ON_SOMATIC_RECOMBINATION_OF_IMMUNE_RECEPTORS_BUILT_FROM_IMMUNOGLOBULIN_SUPERFAMILY_DOMAINS | 154   | 4       | 4.896  |
| GO_B_CELL_RECEPTOR_SIGNALING_PATHWAY                                                                                         | 54    | 3       | 4.727  |
| GO_LEUKOCYTE_MEDIATED_IMMUNITY                                                                                               | 189   | 4       | 4.546  |
| GO_PHAGOCYTOSIS                                                                                                              | 190   | 4       | 4.537  |
| GO_ACTIVATION_OF_IMMUNE_RESPONSE                                                                                             | 427   | 5       | 4.39   |
| GO_REGULATION_OF_CELL_ACTIVATION                                                                                             | 484   | 5       | 4.131  |

## MS (down)

### GsVec

| Training gene signature name                             | Genes | Overlap | GsVec |
|----------------------------------------------------------|-------|---------|-------|
| GO_POSITIVE_REGULATION_OF_LOCOMOTION                     | 420   | 9       | 0.592 |
| GO_POSITIVE_REGULATION_OF_CELL_PROJECTION_ORGANIZATION   | 303   | 2       | 0.590 |
| GO_TAXIS                                                 | 464   | 6       | 0.581 |
| GO_POSITIVE_REGULATION_OF_NERVOUS_SYSTEM_DEVELOPMENT     | 437   | 3       | 0.578 |
| GO_POSITIVE_REGULATION_OF_CELL_DEVELOPMENT               | 472   | 4       | 0.577 |
| GO_SECRETION_BY_CELL                                     | 486   | 8       | 0.575 |
| GO_NEGATIVE_REGULATION_OF_TRANSPORT                      | 458   | 8       | 0.566 |
| GO_POSITIVE_REGULATION_OF_NEURON_DIFFERENTIATION         | 306   | 3       | 0.559 |
| GO_POSITIVE_REGULATION_OF_NEURON_PROJECTION_DEVELOPMENT  | 232   | 2       | 0.557 |
| GO_RESPONSE_TO_GROWTH_FACTOR                             | 475   | 4       | 0.555 |
| GO_CELL_MORPHOGENESIS_INVOLVED_IN_NEURON_DIFFERENTIATION | 368   | 4       | 0.550 |
| GO_NEGATIVE_REGULATION_OF_SECRETION                      | 200   | 3       | 0.550 |
| GO_REGULATION_OF_ANATOMICAL_STRUCTURE_SIZE               | 472   | 8       | 0.550 |
| GO_NEURON_PROJECTION_MORPHOGENESIS                       | 402   | 4       | 0.548 |
| GO_POSITIVE_REGULATION_OF_SECRETION                      | 370   | 5       | 0.548 |

### Fisher

| Training gene signature name                                            | Genes | Overlap | Fisher |
|-------------------------------------------------------------------------|-------|---------|--------|
| GO_INFLAMMATORY_RESPONSE                                                | 454   | 11      | 5.939  |
| PID_INTEGRIN_A9B1_PATHWAY                                               | 25    | 4       | 5.613  |
| GO_RECEPTOR_MEDIATED_ENDOCYTOSIS                                        | 231   | 8       | 5.541  |
| PID_INTEGRIN1_PATHWAY                                                   | 66    | 5       | 5.257  |
| KEGG_COMPLEMENT_AND_COAGULATION_CASCADES                                | 69    | 5       | 5.161  |
| GO_RESPONSE_TO_MOLECULE_OF_BACTERIAL_ORIGIN                             | 321   | 8       | 4.501  |
| GO_POSITIVE_REGULATION_OF_LOCOMOTION                                    | 420   | 9       | 4.496  |
| GO_RESPONSE_TO_OXIDATIVE_STRESS                                         | 352   | 8       | 4.217  |
| GO_LEUKOCYTE_MIGRATION                                                  | 259   | 7       | 4.209  |
| GO_POSITIVE_REGULATION_OF_ENDOCYTOSIS                                   | 114   | 5       | 4.103  |
| GO_RESPONSE_TO_INORGANIC_SUBSTANCE                                      | 479   | 9       | 4.055  |
| GO_RESPONSE_TO_MAGNESIUM_ION                                            | 23    | 3       | 4.031  |
| PID_TOLL_ENDOGENOUS_PATHWAY                                             | 25    | 3       | 3.92   |
| GO_POSITIVE_REGULATION_OF_VASCULAR_ENDOTHELIAL_GROWTH_FACTOR_PRODUCTION | 26    | 3       | 3.868  |

Figure 6

## CD (up)

### GsVec

| Training gene signature name                            | Genes | Overlap | GsVec |
|---------------------------------------------------------|-------|---------|-------|
| GO_RESPONSE_TO_INTERFERON_GAMMA                         | 144   | 9       | 0.576 |
| GO_REGULATION_OF_HOMOTYPIC_CELL_CELL_ADHESION           | 307   | 9       | 0.563 |
| GO_CELLULAR_RESPONSE_TO_INTERFERON_GAMMA                | 122   | 7       | 0.560 |
| GO_REGULATION_OF_CELL_CELL_ADHESION                     | 380   | 9       | 0.558 |
| KEGG_INTESTINAL_IMMUNE_NETWORK_FOR_IGA_PRODUCTION       | 48    | 7       | 0.557 |
| GO_POSITIVE_REGULATION_OF_CELL_ADHESION                 | 376   | 8       | 0.553 |
| GO_LYMPHOCYTE_COSTIMULATION                             | 78    | 5       | 0.553 |
| GO_POSITIVE_REGULATION_OF_CELL_CELL_ADHESION            | 243   | 8       | 0.551 |
| GO_INFLAMMATORY_RESPONSE                                | 454   | 12      | 0.551 |
| GO_LEUKOCYTE_MIGRATION                                  | 259   | 5       | 0.543 |
| GO_REGULATION_OF_LEUKOCYTE_MIGRATION                    | 149   | 6       | 0.543 |
| GO_REGULATION_OF_IMMUNE_EFFECTOR_PROCESS                | 424   | 4       | 0.541 |
| GO_POSITIVE_REGULATION_OF_RESPONSE_TO_EXTERNAL_STIMULUS | 296   | 7       | 0.540 |
| GO_NEGATIVE_REGULATION_OF_IMMUNE_SYSTEM_PROCESS         | 372   | 5       | 0.529 |

### Fisher

| Training gene signature name                                                                   | Genes | Overlap | Fisher |
|------------------------------------------------------------------------------------------------|-------|---------|--------|
| GO_CYTOKINE_MEDIATED_SIGNALING_PATHWAY                                                         | 452   | 15      | 12.983 |
| KEGG_ASTHMA                                                                                    | 30    | 7       | 12.209 |
| KEGG_ALLOGRAFT_REJECTION                                                                       | 38    | 7       | 11.423 |
| KEGG_GRAFT_VERSUS_HOST_DISEASE                                                                 | 42    | 7       | 11.096 |
| KEGG_TYPE_I_DIABETES_MELLITUS                                                                  | 44    | 7       | 10.945 |
| KEGG_INTESTINAL_IMMUNE_NETWORK_FOR_IGA_PRODUCTION                                              | 48    | 7       | 10.665 |
| KEGG_ANTIGEN_PROCESSING_AND_PRESENTATION                                                       | 89    | 8       | 10.398 |
| KEGG_AUTOIMMUNE_THYROID_DISEASE                                                                | 53    | 7       | 10.348 |
| GO_RESPONSE_TO_INTERFERON_GAMMA                                                                | 144   | 9       | 10.227 |
| GO_ANTIGEN_PROCESSING_AND_PRESENTATION_OF_PEPTIDE_OR_POLYSACCHARIDE_ANTIGEN_VIA_MHC_CLASSES_II | 94    | 8       | 10.204 |
| KEGG_LEISHMANIA_INFECTION                                                                      | 72    | 7       | 9.383  |
| KEGG_VIRAL_MYOCARDITIS                                                                         | 73    | 7       | 9.340  |
| GO_INFLAMMATORY_RESPONSE                                                                       | 454   | 12      | 9.214  |
| GO_ANTIGEN_PROCESSING_AND_PRESENTATION_OF_PEPTIDE_ANTIGEN                                      | 177   | 8       | 8.007  |
| GO_CELLULAR_RESPONSE_TO_INTERFERON_GAMMA                                                       | 122   | 7       | 7.764  |

Figure 7

## T2D (up)

### GsVec

| Training gene signature name                            | Genes | Overlap | GsVec |
|---------------------------------------------------------|-------|---------|-------|
| GO_TAXIS                                                | 464   | 11      | 0.630 |
| GO_SINGLE_ORGANISM_CELL_ADHESION                        | 459   | 7       | 0.612 |
| GO_LEUKOCYTE_MIGRATION                                  | 259   | 7       | 0.611 |
| GO_POSITIVE_REGULATION_OF_LOCOMOTION                    | 420   | 15      | 0.607 |
| GO_REGULATION_OF_RESPONSE_TO_WOUNDING                   | 413   | 13      | 0.595 |
| GO_POSITIVE_REGULATION_OF_RESPONSE_TO_EXTERNAL_STIMULUS | 296   | 9       | 0.582 |
| GO_REGULATION_OF_PEPTIDASE_ACTIVITY                     | 392   | 11      | 0.580 |
| GO_REGULATION_OF_INFLAMMATORY_RESPONSE                  | 294   | 8       | 0.575 |
| GO_POSITIVE_REGULATION_OF_MAPK_CASCADE                  | 470   | 10      | 0.572 |
| REACTOME_DEVELOPMENTAL_BIOLOGY                          | 396   | 3       | 0.568 |
| GO_REGULATION_OF_HOMEOSTATIC_PROCESS                    | 447   | 5       | 0.562 |
| GO_NEGATIVE_REGULATION_OF_PROTEOLYSIS                   | 329   | 8       | 0.561 |
| GO_EPITHELIAL_CELL_DIFFERENTIATION                      | 495   | 8       | 0.561 |
| GO_POSITIVE_REGULATION_OF_CELL_DEVELOPMENT              | 472   | 8       | 0.557 |
| GO_INFLAMMATORY_RESPONSE                                | 454   | 16      | 0.555 |

### Fisher

| Training gene signature name                      | Genes | Overlap | Fisher |
|---------------------------------------------------|-------|---------|--------|
| GO_INFLAMMATORY_RESPONSE                          | 454   | 16      | 10.343 |
| GO_POSITIVE_REGULATION_OF_LOCOMOTION              | 420   | 15      | 9.785  |
| PID_FRA_PATHWAY                                   | 37    | 6       | 8.058  |
| PID_INTEGRIN1_PATHWAY                             | 66    | 7       | 7.990  |
| GO_REGULATION_OF_LEUKOCYTE_MIGRATION              | 149   | 9       | 7.957  |
| KEGG_CYTOKINE_CYTOKINE_RECEPTOR_INTERACTION       | 267   | 11      | 7.888  |
| GO_REGULATION_OF_RESPONSE_TO_WOUNDING             | 413   | 13      | 7.856  |
| GO_POSITIVE_REGULATION_OF_LEUKOCYTE_MIGRATION     | 109   | 8       | 7.785  |
| GO_REGULATION_OF_VASCULATURE_DEVELOPMENT          | 233   | 10      | 7.373  |
| GO_EXTRACELLULAR_STRUCTURE_ORGANIZATION           | 304   | 11      | 7.310  |
| GO_VASCULATURE_DEVELOPMENT                        | 469   | 13      | 7.208  |
| GO_WOUND_HEALING                                  | 470   | 13      | 7.197  |
| GO_POSITIVE_REGULATION_OF_VASCULATURE_DEVELOPMENT | 133   | 8       | 7.107  |
| GO_REGULATION_OF_NEUTROPHIL_MIGRATION             | 32    | 5       | 6.703  |
| GO_CYTOKINE_MEDIATED_SIGNALING_PATHWAY            | 452   | 12      | 6.478  |

Figure 8

## DMD (up)

### GsVec

| Training gene signature name                                | Genes | Overlap | GsVec |
|-------------------------------------------------------------|-------|---------|-------|
| GO_EXTRACELLULAR_STRUCTURE_ORGANIZATION                     | 304   | 26      | 0.743 |
| GO_OSSIFICATION                                             | 251   | 21      | 0.700 |
| REACTOME_DEVELOPMENTAL_BIOLOGY                              | 396   | 9       | 0.698 |
| GO_MULTICELLULAR_ORGANISM_METABOLIC_PROCESS                 | 93    | 11      | 0.676 |
| KEGG_FOCAL_ADHESION                                         | 201   | 12      | 0.673 |
| GO_CONNECTIVE_TISSUE_DEVELOPMENT                            | 194   | 10      | 0.668 |
| REACTOME_AXON_GUIDANCE                                      | 251   | 9       | 0.668 |
| REACTOME_SIGNALING_BY_PDGF                                  | 122   | 9       | 0.665 |
| GO_POSITIVE_REGULATION_OF_CELL_DEVELOPMENT                  | 472   | 11      | 0.660 |
| GO_MULTICELLULAR_ORGANISMAL_MACROMOLECULE_METABOLIC_PROCESS | 79    | 11      | 0.656 |
| GO_COLLAGEN_FIBRIL_ORGANIZATION                             | 38    | 7       | 0.652 |
| GO_SENSORY_ORGAN_DEVELOPMENT                                | 493   | 14      | 0.649 |
| GO_SINGLE_ORGANISM_CELL_ADHESION                            | 459   | 5       | 0.649 |
| GO_RESPONSE_TO_MECHANICAL_STIMULUS                          | 210   | 11      | 0.648 |
| GO_CARTILAGE_DEVELOPMENT                                    | 147   | 9       | 0.647 |

### Fisher

| Training gene signature name                                | Genes | Overlap | Fisher |
|-------------------------------------------------------------|-------|---------|--------|
| GO_EXTRACELLULAR_STRUCTURE_ORGANIZATION                     | 304   | 26      | 19.283 |
| GO_OSSIFICATION                                             | 251   | 21      | 15.391 |
| PID_INTEGRIN1_PATHWAY                                       | 66    | 12      | 13.046 |
| REACTOME_EXTRACELLULAR_MATRIX_ORGANIZATION                  | 87    | 13      | 12.936 |
| GO_SKELETAL_SYSTEM_DEVELOPMENT                              | 455   | 22      | 11.238 |
| PID_AVB3_INTEGRIN_PATHWAY                                   | 75    | 11      | 10.927 |
| REACTOME_COLLAGEN_FORMATION                                 | 58    | 10      | 10.708 |
| GO_MULTICELLULAR_ORGANISMAL_MACROMOLECULE_METABOLIC_PROCESS | 79    | 11      | 10.673 |
| PID_SYNDECAN_1_PATHWAY                                      | 46    | 9       | 10.210 |
| GO_MULTICELLULAR_ORGANISM_METABOLIC_PROCESS                 | 93    | 11      | 9.883  |
| GO_WOUND_HEALING                                            | 470   | 20      | 9.262  |
| KEGG_ECM_RECEPTOR_INTERACTION                               | 84    | 10      | 9.058  |
| KEGG_COMPLEMENT_AND_COAGULATION_CASCADES                    | 69    | 9       | 8.563  |
| GO_OSTEOBLAST_DIFFERENTIATION                               | 126   | 11      | 8.454  |
| GO_CELLULAR_RESPONSE_TO_AMINO_ACID_STIMULUS                 | 53    | 8       | 8.187  |

Figure 9

## SLE (up)

### GsVec

| Training gene signature name                            | Genes | Overlap | GsVec |
|---------------------------------------------------------|-------|---------|-------|
| GO_IMMUNE_EFFECTOR_PROCESS                              | 486   | 53      | 0.731 |
| GO_INFLAMMATORY_RESPONSE                                | 454   | 33      | 0.712 |
| GO_REGULATION_OF_MULTI_ORGANISM_PROCESS                 | 470   | 43      | 0.694 |
| GO_NEGATIVE_REGULATION_OF_IMMUNE_SYSTEM_PROCESS         | 372   | 25      | 0.693 |
| GO_RESPONSE_TO_VIRUS                                    | 247   | 35      | 0.692 |
| GO_SINGLE_ORGANISM_CELL_ADHESION                        | 459   | 15      | 0.685 |
| GO_REGULATION_OF_IMMUNE_EFFECTOR_PROCESS                | 424   | 22      | 0.684 |
| GO_NEGATIVE_REGULATION_OF_CYTOKINE_PRODUCTION           | 211   | 18      | 0.683 |
| GO_WOUND_HEALING                                        | 470   | 10      | 0.683 |
| GO_NEGATIVE_REGULATION_OF_DEFENSE_RESPONSE              | 144   | 12      | 0.681 |
| GO_REGULATION_OF_CELL_GROWTH                            | 391   | 15      | 0.681 |
| GO_LEUKOCYTE_ACTIVATION                                 | 414   | 12      | 0.680 |
| GO_REGULATION_OF_CELL_ACTIVATION                        | 484   | 21      | 0.679 |
| GO_NEGATIVE_REGULATION_OF_RESPONSE_TO_EXTERNAL_STIMULUS | 274   | 16      | 0.679 |
| GO_POSITIVE_REGULATION_OF_CYTOKINE_PRODUCTION           | 370   | 24      | 0.679 |

### Fisher

| Training gene signature name                                         | Genes | Overlap | Fisher |
|----------------------------------------------------------------------|-------|---------|--------|
| GO_DEFENSE_RESPONSE_TO_VIRUS                                         | 164   | 32      | 16.093 |
| GO_IMMUNE_EFFECTOR_PROCESS                                           | 486   | 53      | 14.606 |
| GO_NEGATIVE_REGULATION_OF_VIRAL_GENOME_REPLICATION                   | 49    | 17      | 13.246 |
| GO_RESPONSE_TO_VIRUS                                                 | 247   | 35      | 13.106 |
| REACTOME_INTERFERON_SIGNALING                                        | 159   | 28      | 12.976 |
| GO_RESPONSE_TO_TYPE_I_INTERFERON                                     | 68    | 19      | 12.783 |
| GO_NEGATIVE_REGULATION_OF_MULTI_ORGANISM_PROCESS                     | 151   | 27      | 12.701 |
| REACTOME_INTERFERON_ALPHA_BETA_SIGNALING                             | 64    | 18      | 12.197 |
| GO_HUMORAL_IMMUNE_RESPONSE                                           | 187   | 29      | 11.959 |
| GO_REGULATION_OF_SYMBIOSIS_ENCOMPASSING_MUTUALISM_THROUGH_PARASITISM | 205   | 30      | 11.682 |
| GO_NEGATIVE_REGULATION_OF_VIRAL_PROCESS                              | 89    | 20      | 11.482 |
| GO_REGULATION_OF_VIRAL_GENOME_REPLICATION                            | 75    | 18      | 10.912 |
| GO_CYTOKINE_MEDIATED_SIGNALING_PATHWAY                               | 452   | 44      | 10.523 |
| REACTOME_CYTOKINE_SIGNALING_IN_IMMUNE_SYSTEM                         | 270   | 32      | 9.941  |
| GO_REGULATION_OF_MULTI_ORGANISM_PROCESS                              | 470   | 43      | 9.439  |

Figure 10

## Sarcoidosis (up)

### GsVec

| Training gene signature name                                        | Genes | Overlap | GsVec |
|---------------------------------------------------------------------|-------|---------|-------|
| GO_POSITIVE_REGULATION_OF_MAPK_CASCADE                              | 470   | 5       | 0.666 |
| GO_POSITIVE_REGULATION_OF_KINASE_ACTIVITY                           | 482   | 6       | 0.652 |
| GO_POSITIVE_REGULATION_OF_PROTEIN_SERINE_THREONINE_KINASE_ACTIVITY  | 289   | 4       | 0.625 |
| GO_REGULATION_OF_MAP_KINASE_ACTIVITY                                | 319   | 3       | 0.625 |
| GO_ACTIVATION_OF_PROTEIN_KINASE_ACTIVITY                            | 279   | 3       | 0.617 |
| GO_POSITIVE_REGULATION_OF_CELLULAR_COMPONENT_BIOGENESIS             | 406   | 7       | 0.614 |
| GO_POSITIVE_REGULATION_OF_MAP_KINASE_ACTIVITY                       | 207   | 3       | 0.608 |
| GO_RESPONSE_TO_GROWTH_FACTOR                                        | 475   | 5       | 0.607 |
| GO_WOUND_HEALING                                                    | 470   | 7       | 0.606 |
| GO_REGULATION_OF_PROTEIN_SERINE_THREONINE_KINASE_ACTIVITY           | 470   | 5       | 0.601 |
| GO_TRANSMEMBRANE_RECEPTOR_PROTEIN_TYROSINE_KINASE_SIGNALING_PATHWAY | 498   | 2       | 0.599 |
| GO_SIGNAL_TRANSDUCTION_BY_PROTEIN_PHOSPHORYLATION                   | 404   | 5       | 0.597 |
| GO_NEGATIVE_REGULATION_OF_INTRACELLULAR_SIGNAL_TRANSDUCTION         | 437   | 5       | 0.596 |
| GO_PROTEIN_AUTOPHOSPHORYLATION                                      | 192   | 2       | 0.594 |
| GO_REGULATION_OF_PROTEIN_SECRETION                                  | 389   | 10      | 0.592 |

### Fisher

| Training gene signature name                  | Genes | Overlap | Fisher |
|-----------------------------------------------|-------|---------|--------|
| GO_CYTOKINE_PRODUCTION                        | 120   | 9       | 6.043  |
| GO_INFLAMMATORY_RESPONSE                      | 454   | 16      | 5.735  |
| GO_CHEMOKINE_MEDIATED_SIGNALING_PATHWAY       | 72    | 7       | 5.568  |
| GO_RESPONSE_TO_INTERFERON_GAMMA               | 144   | 9       | 5.383  |
| KEGG_CHEMOKINE_SIGNALING_PATHWAY              | 190   | 10      | 5.252  |
| REACTOME_G_ALPHA_I_SIGNALLING_EVENTS          | 195   | 10      | 5.153  |
| REACTOME_CHEMOKINE_RECEPTORS_BIND_CHEMOKINES  | 57    | 6       | 5.047  |
| GO_CELLULAR_RESPONSE_TO_INTERFERON_GAMMA      | 122   | 8       | 4.996  |
| GO_CELL_CHEMOTAXIS                            | 162   | 9       | 4.967  |
| REACTOME_INTERFERON_GAMMA_SIGNALING           | 63    | 6       | 4.793  |
| GO_CYTOKINE_SECRETION                         | 38    | 5       | 4.767  |
| GO_LYMPHOCYTE_CHEMOTAXIS                      | 38    | 5       | 4.767  |
| GO_REGULATION_OF_CHEMOTAXIS                   | 180   | 9       | 4.602  |
| GO_POSITIVE_REGULATION_OF_LEUKOCYTE_MIGRATION | 109   | 7       | 4.377  |
| GO_LYMPHOCYTE_MIGRATION                       | 49    | 5       | 4.220  |

Figure 11

## SCZ (up)

### GsVec

| Training gene signature name                         | Genes | Overlap | GsVec |
|------------------------------------------------------|-------|---------|-------|
| GO_REGULATION_OF_HORMONE_LEVELS                      | 478   | 7       | 0.705 |
| GO_RESPONSE_TO_DRUG                                  | 431   | 10      | 0.685 |
| GO_RESPONSE_TO_INORGANIC_SUBSTANCE                   | 479   | 8       | 0.667 |
| GO_RESPONSE_TO_STEROID_HORMONE                       | 497   | 8       | 0.662 |
| GO_POSITIVE_REGULATION_OF_CELL_DEVELOPMENT           | 472   | 9       | 0.658 |
| GO_EPITHELIAL_CELL_DIFFERENTIATION                   | 495   | 14      | 0.657 |
| GO_VASCULATURE_DEVELOPMENT                           | 469   | 15      | 0.656 |
| GO_POSITIVE_REGULATION_OF_NERVOUS_SYSTEM_DEVELOPMENT | 437   | 8       | 0.649 |
| GO_AGING                                             | 264   | 6       | 0.648 |
| GO_RESPONSE_TO_ALCOHOL                               | 362   | 9       | 0.647 |
| GO_NEGATIVE_REGULATION_OF_TRANSPORT                  | 458   | 7       | 0.647 |
| GO_WOUND_HEALING                                     | 470   | 14      | 0.646 |
| GO_CELLULAR_RESPONSE_TO_ORGANIC_CYCLIC_COMPOUND      | 465   | 8       | 0.645 |
| GO_RESPONSE_TO_EXTRACELLULAR_STIMULUS                | 441   | 6       | 0.645 |
| GO_SENSORY_ORGAN_DEVELOPMENT                         | 493   | 20      | 0.644 |

### Fisher

| Training gene signature name                     | Genes | Overlap | Fisher |
|--------------------------------------------------|-------|---------|--------|
| GO_GLIOGENESIS                                   | 175   | 13      | 6.889  |
| GO_GLIAL_CELL_DIFFERENTIATION                    | 136   | 11      | 6.282  |
| GO_NEPHRON_DEVELOPMENT                           | 115   | 10      | 6.050  |
| GO_DORSAL_VENTRAL_PATTERN_FORMATION              | 91    | 9       | 5.970  |
| GO_SENSORY_ORGAN_DEVELOPMENT                     | 493   | 20      | 5.907  |
| GO_NOTOCHORD_DEVELOPMENT                         | 18    | 5       | 5.828  |
| GO_UROGENITAL_SYSTEM_DEVELOPMENT                 | 299   | 15      | 5.660  |
| GO_ASTROCYTE_DIFFERENTIATION                     | 39    | 6       | 5.279  |
| GO_SPINAL_CORD_PATTERNING                        | 24    | 5       | 5.157  |
| GO_TELENCEPHALON_DEVELOPMENT                     | 228   | 12      | 4.843  |
| GO_CELL_FATE_SPECIFICATION                       | 71    | 7       | 4.752  |
| GO_BRANCHING_MORPHOGENESIS_OF_AN_EPITHELIAL_TUBE | 131   | 9       | 4.664  |
| GO_EMBRYONIC_ORGAN_MORPHOGENESIS                 | 279   | 13      | 4.637  |
| GO_PROXIMAL_DISTAL_PATTERN_FORMATION             | 32    | 5       | 4.514  |
| GO_RESPONSE_TO_GROWTH_FACTOR                     | 475   | 17      | 4.401  |

Figure 12

**A**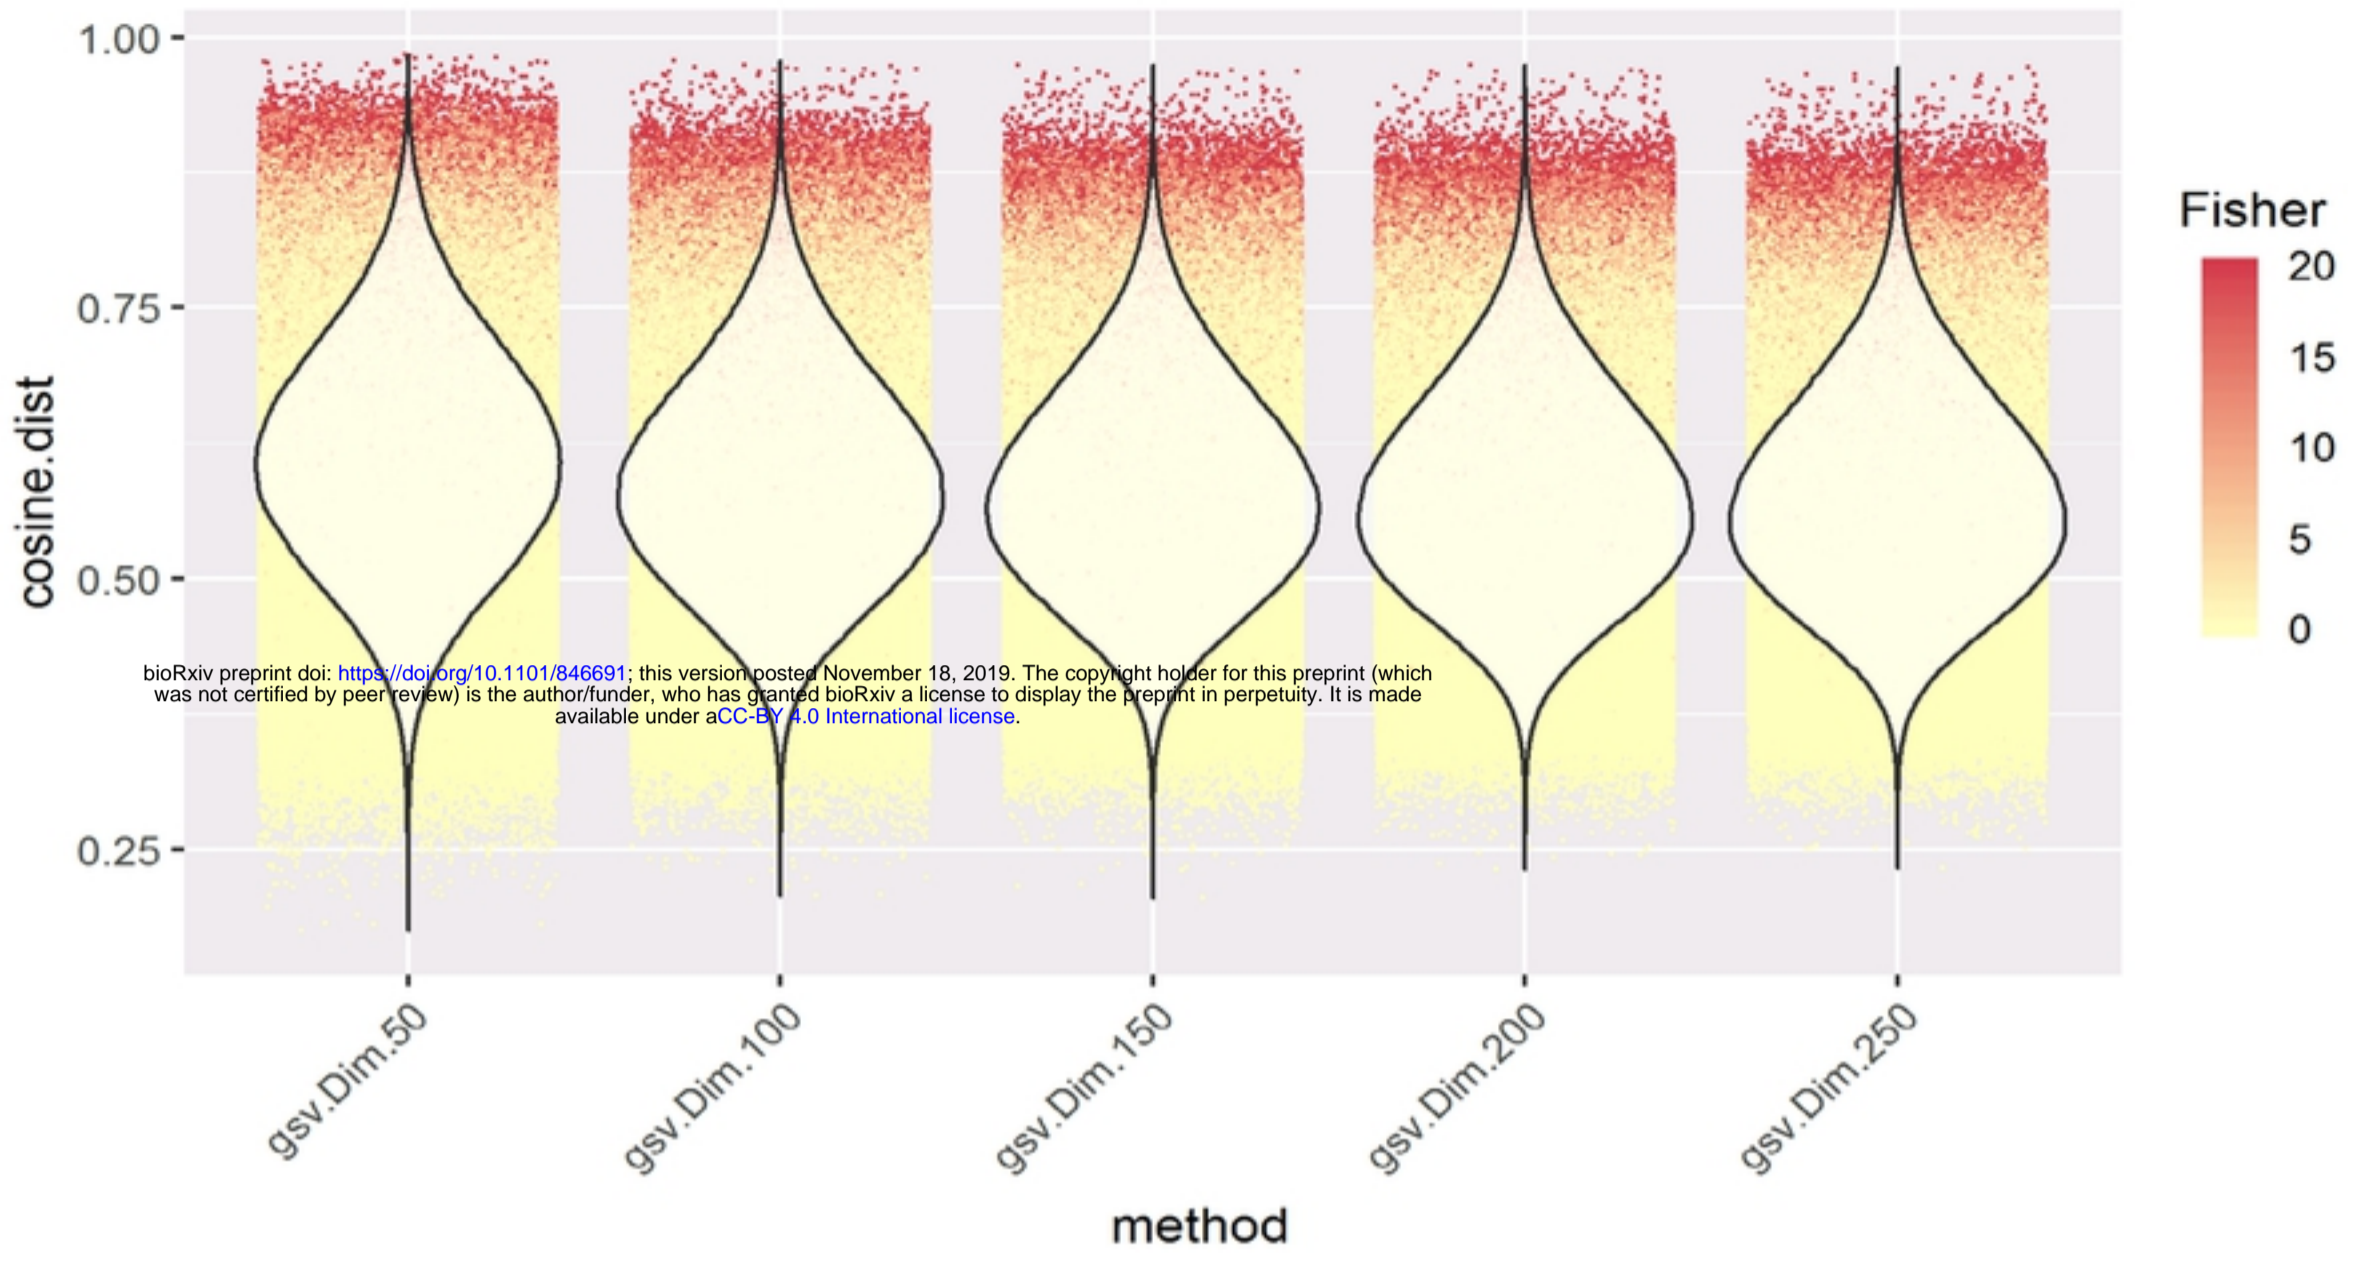**B**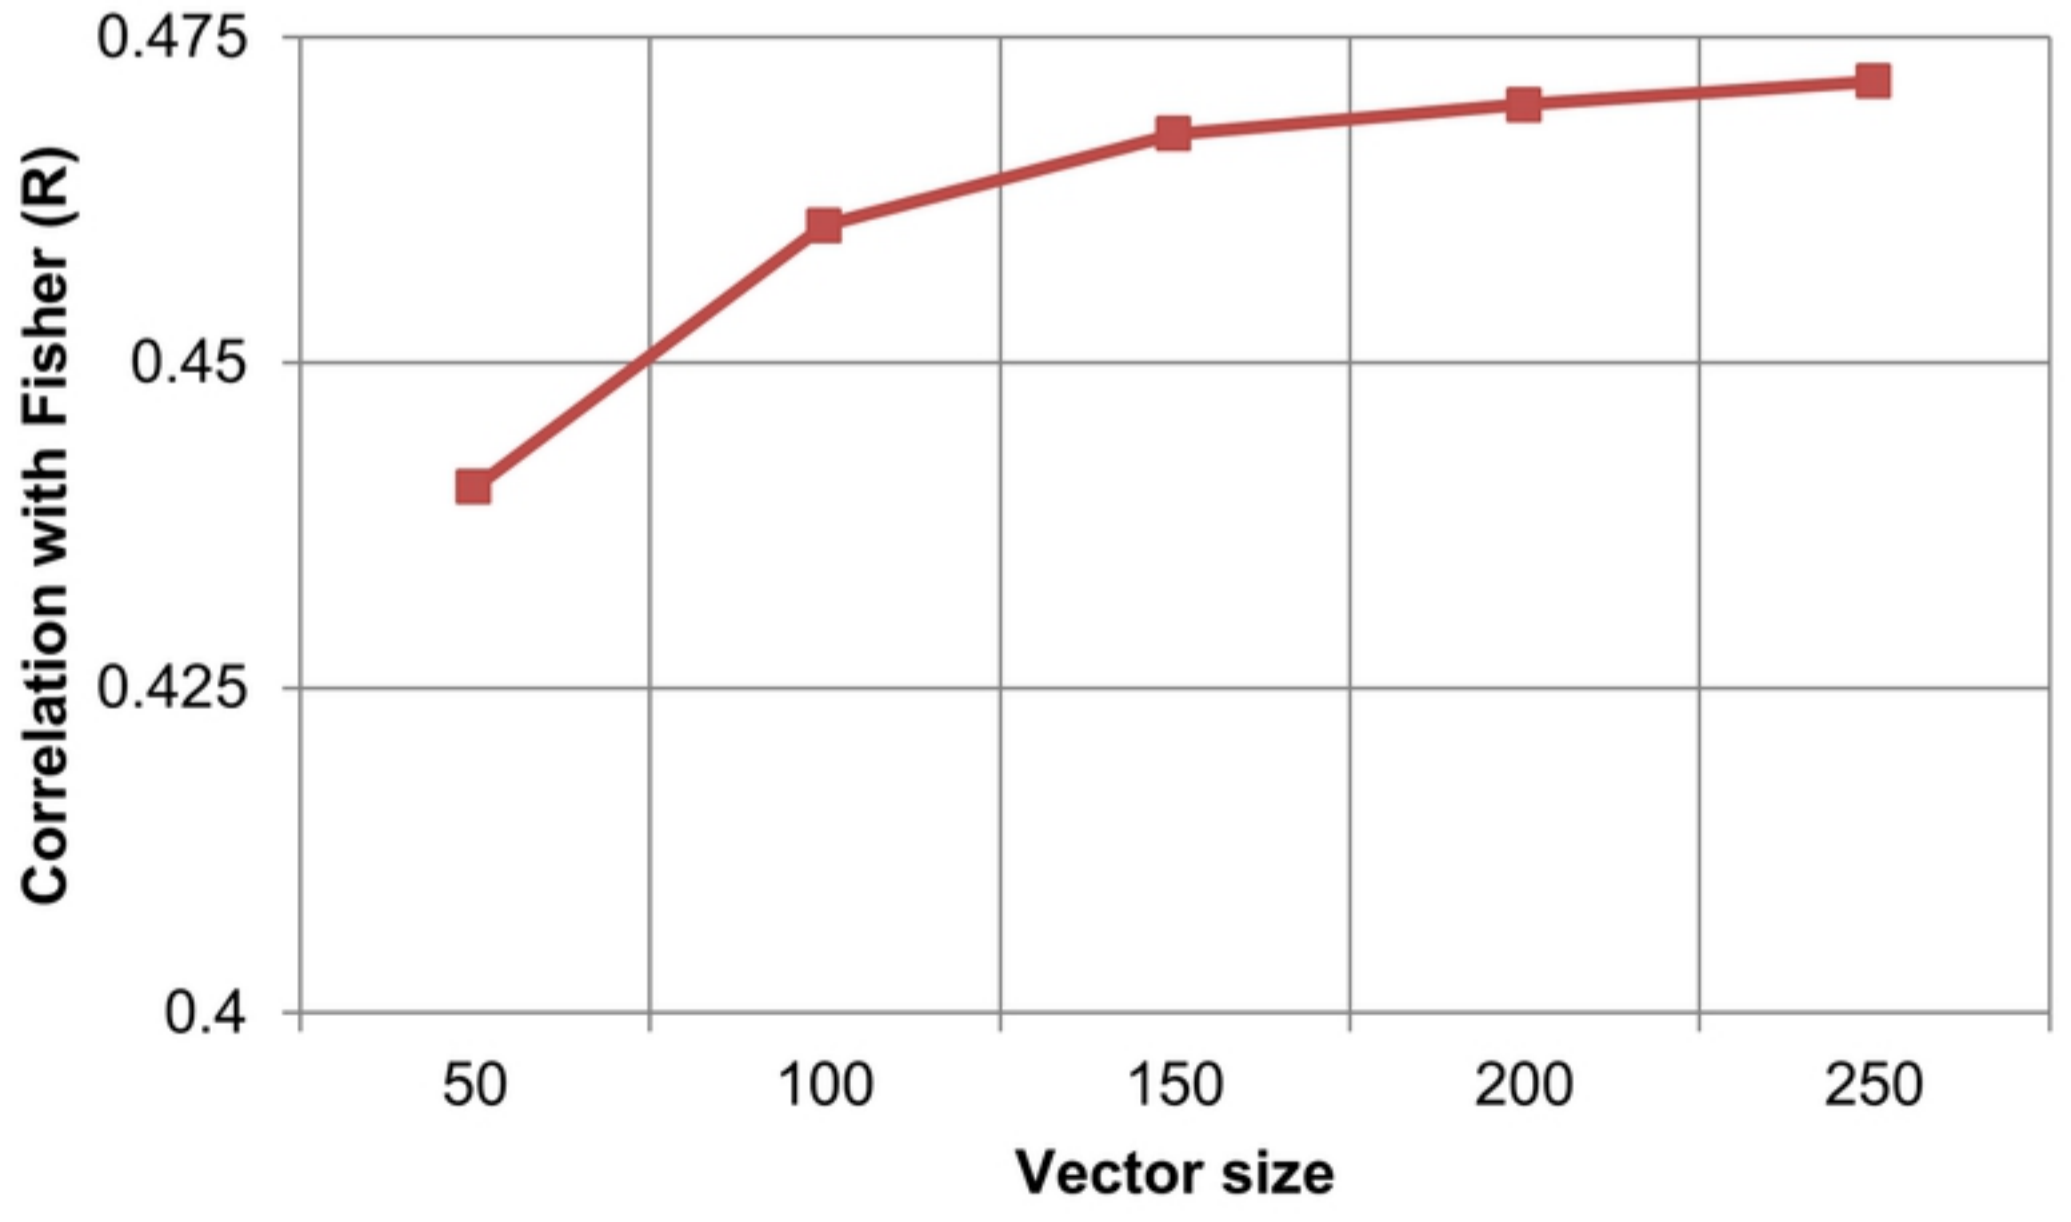

S1 Figure



A

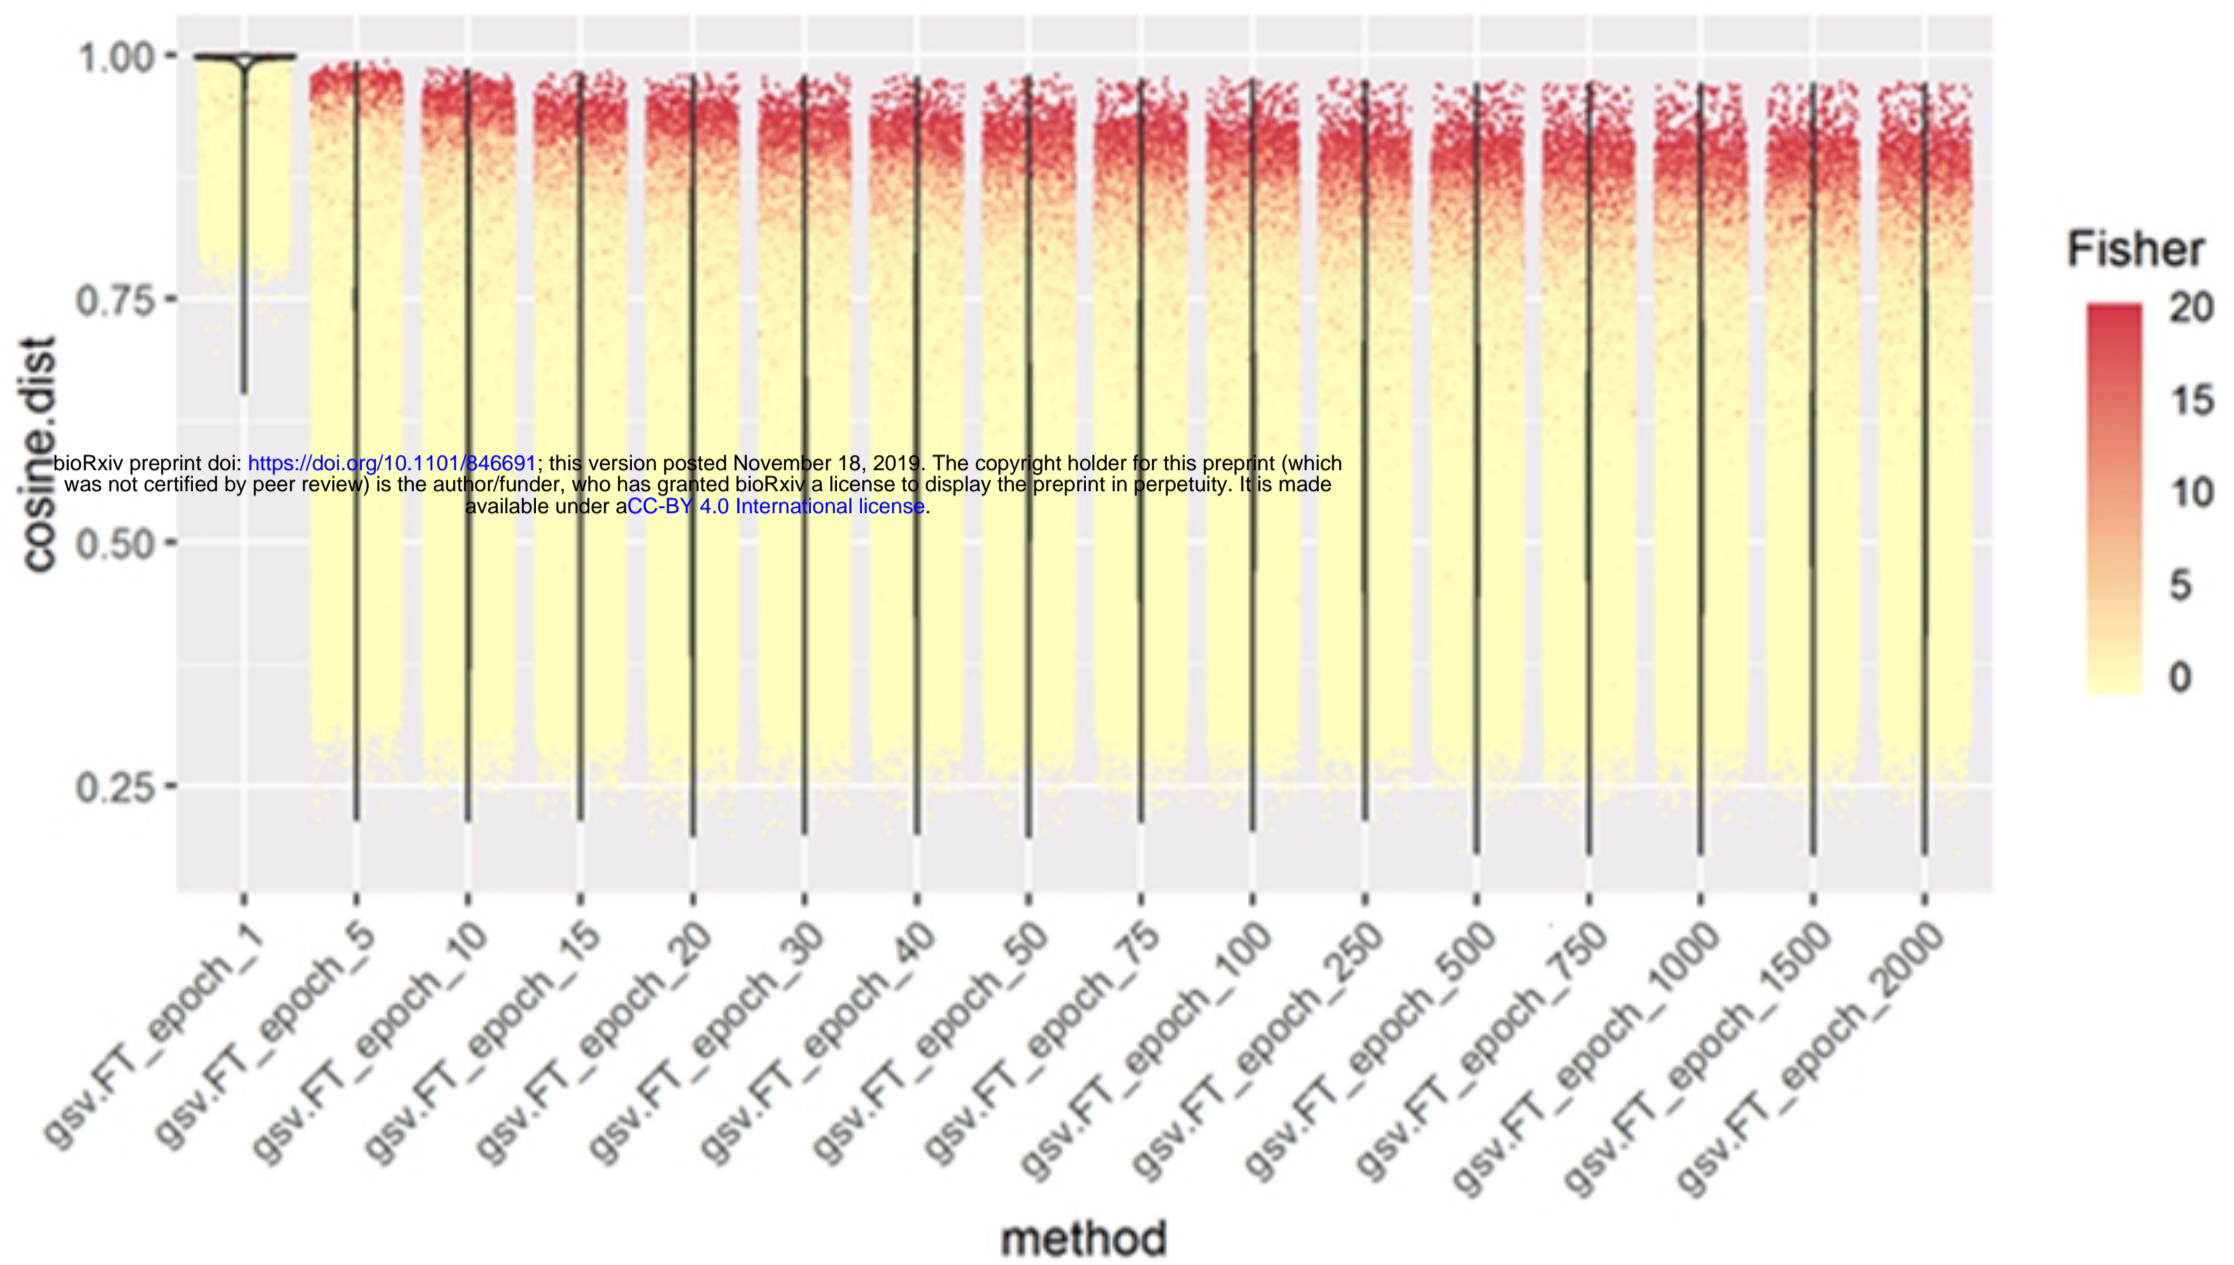

B

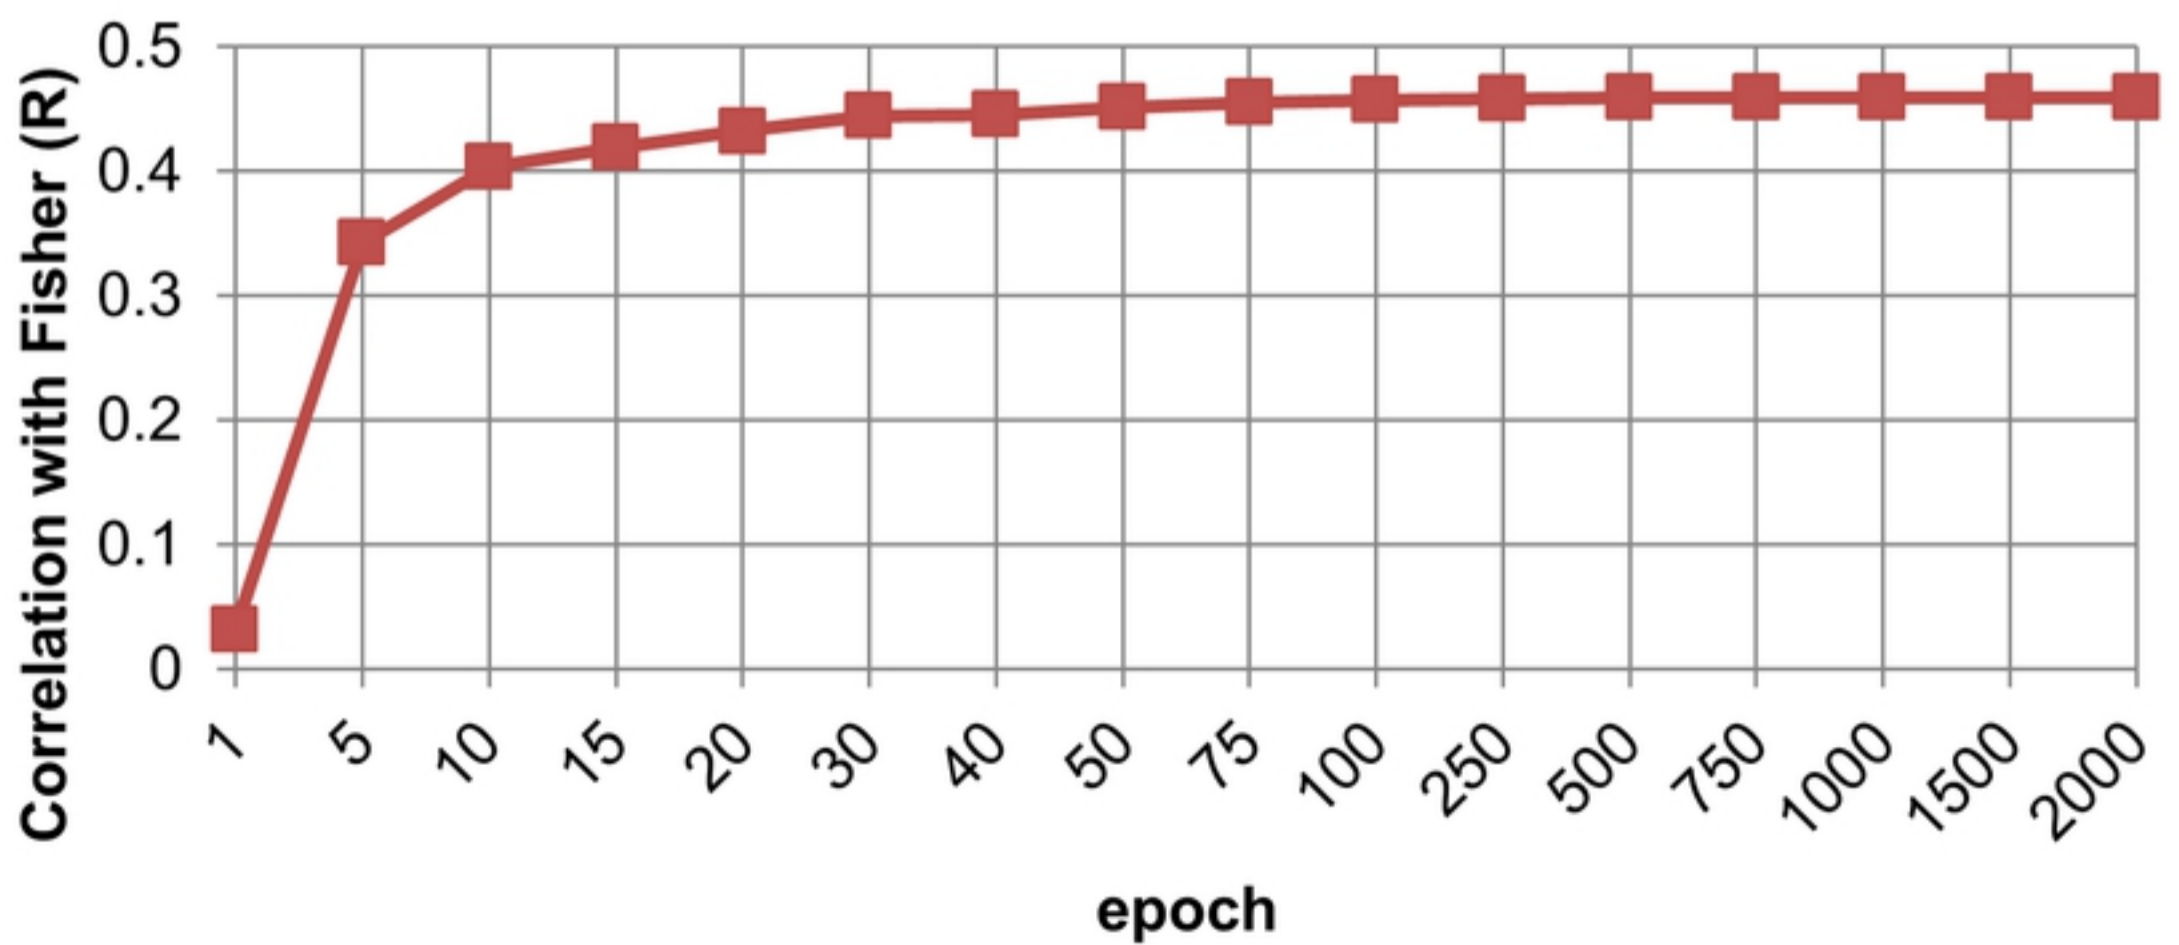

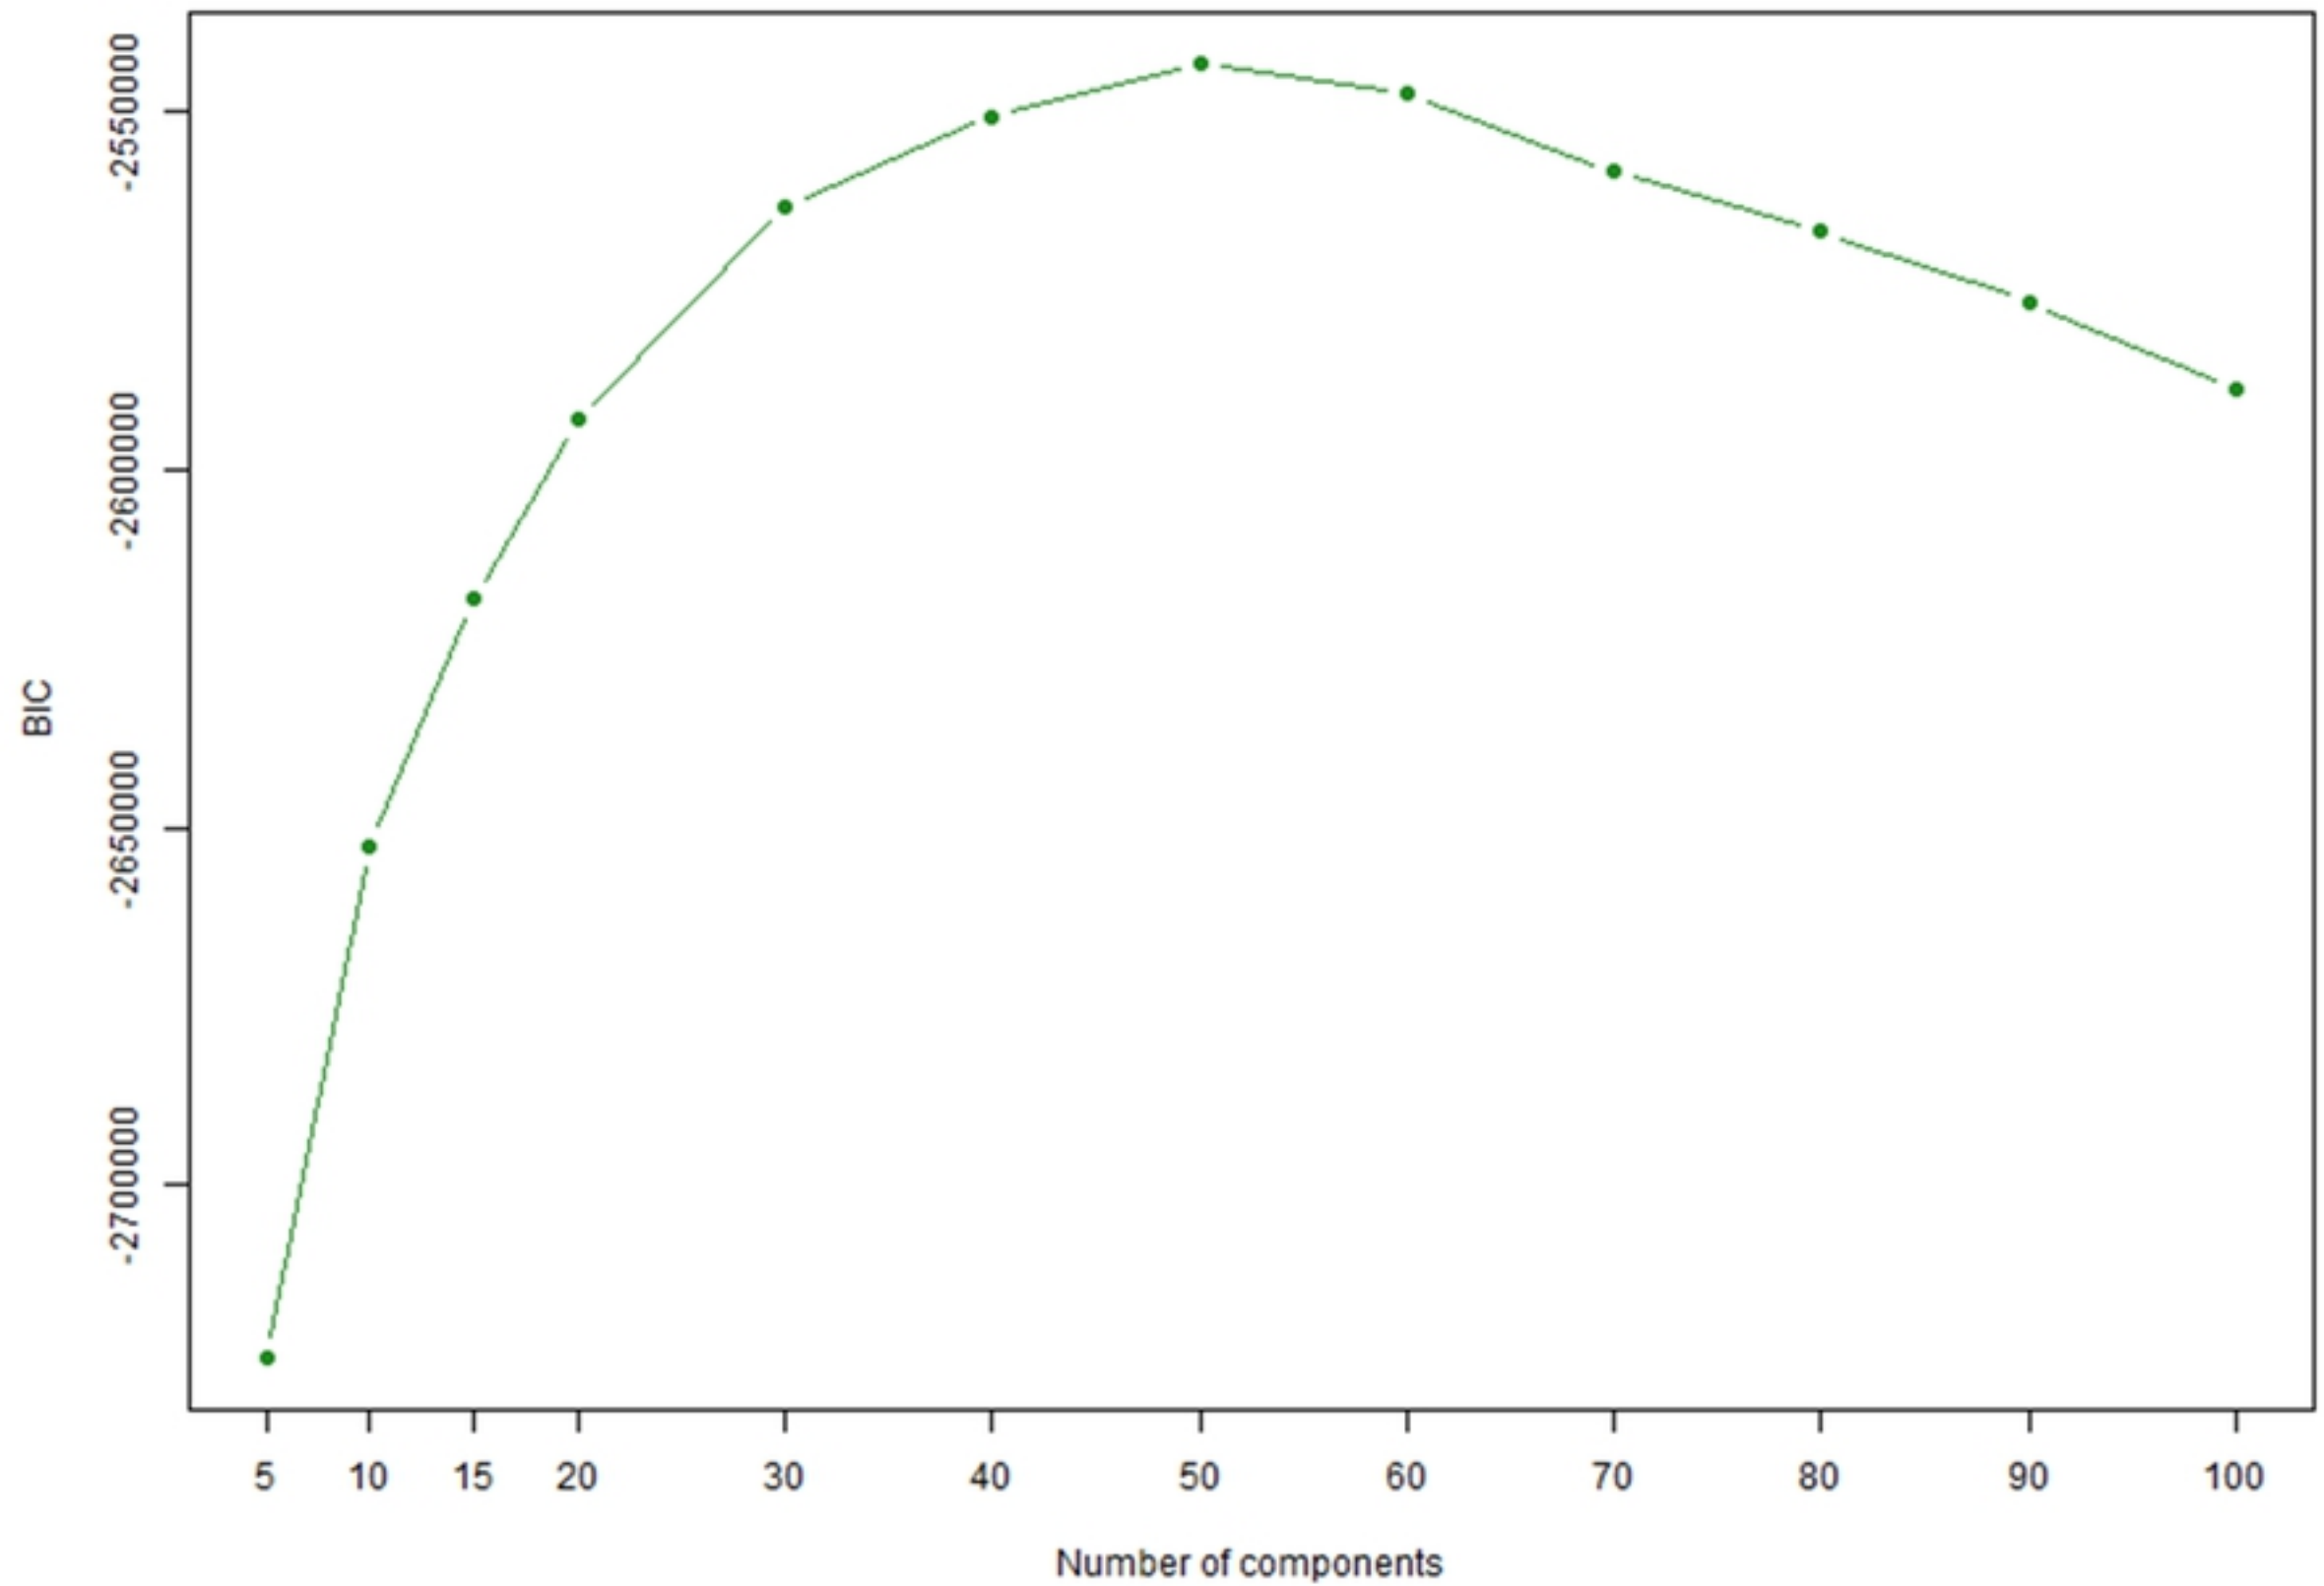

S3 Figure
